# Supplementary material for: A Novel Method to Dynamically Observe the Three-dimensional Global Oceanic Dissolved Organic Carbon Reservoir
Source: Research Square preprint supplement (doi:10.21203/rs.3.rs-2357170/v1), 2023-02-02
Supplement: Supplementary file 1 [file 15d27665eb1af6fd6dd3f077.docx]

**A Novel Method to Dynamically Observe the Three-dimensional Global Oceanic Dissolved Organic Carbon Reservoir**

Mingquan Yan 1, 2,*, #, Zhongli Liu 1, 2, #, Shansheng Mo 1, 2, #, Chenyang Zhang 1, 2, Fei Liu 3, Gregory Korshin 4

1 College of Environmental Sciences and Engineering, Peking University, Beijing 100871, China.

2 The Key Laboratory of Water and Sediment Sciences, Ministry of Education, Beijing 100871, China.

3 School of Earth and Environment, University of Leeds, Woodhouse, Leeds LS2 9JT, United Kingdom.

4 Department of Civil and Environmental Engineering, University of Washington, Box 352700, Seattle, WA 98195-2700, United States.

# These authors contributed equally: Mingquan Yan, Zhongli Liu, Shansheng Mo.

* Corresponding author. Address: College of Environmental Sciences and Engineering, Peking University, Beijing 100871, China. E-mail: [yanmq@pku.edu.cn](mailto:yanmq@pku.edu.cn)

**This file includes:**

Supplementary text

Supplementary Figs. 1 to 6

Supplementary Tables 1 to 3

SI References

**Supplementary text**

**Method of DOM spectrum deconvolution**

The absorbance spectrum of DOM can be assumed to comprise three Gaussian distribution bands when represented vs. photon energy (measured in eV) calculated as using equation (S1) and the models of resultant spectra are represented as equation (S2)

(S1)

(S2)

Where *gi*(*λ*) is the intensity of band *A*i at *λ* nm, *Eoi* (*eV*) is the center of the band, *Aoi* is the amplitude, and *Wi* is the width.

We used the Curve Fitting Tool in MATLAB 2016b to implement the deconvolution of DOM spectrum. Fit type is gauss3, and the method is Nonlinear Least Squares. Because the fitting process has multiple solutions, we restricted the central location of Band A1, A2, and A3 to 6.0-6.3 eV (196.8-206.6 nm), 4.5-4.8 eV (258.3-275.6 nm), and 3.6-3.8 eV (326.3-344.4 nm), respectively, and most of spectra can be fitted well (R2 > 0.99).

Because the spectra of pelagic samples in our database start at 275 nm, and the relative intensities of Band A1 is usually very low above 275 nm (below 20% for most of inland and coastal samples), it is difficult to acquire information about Band A1 only using the spectra above 275 nm, and the Curve Fitting Tool would only use Band A2 and A3 to fit the spectra. Therefore, we assumed that the amplitude, central location, and width of Band A1 were the 5 times of that *a*g(275), 6.0 eV (206.6 nm), and 0.8 eV, respectively.

**Mathematical derivation of the contribution of each band on spectral slopes**

Taking the log of both sides of equation (S2) and then solving the derivations, we can acquire equation (S3).

(S3)

Solving the derivative on the right-hand side of the equation, it can be represented by equation (S4).

(S4)

Meanwhile, according to the rules for derivatives, we can acquire equation (S5), and *gi*(*λ*) can be represented by equation (S6), accordingly.

(S5)

(S6)

Taking equation (S6) into (S4), and simplifying these equations, we can acquire equation (S7).

(S7)

By mathematical derivation, the spectral slope could be represented by the three slopes of log-transformed Gaussian distribution bands, and the relative intensity of Gaussian distribution bands influence the weights of the slopes of log-transformed Gaussian distribution bands.

The slopes of log-transformed Gaussian distribution band can be represented by equation (S8).

(S8)

Where *λoi*is the center of the Gaussian distribution band, *A*oi is the amplitude, and *W*i is the width. The slopes of log-transformed Gaussian distribution band is in direct proportion to , and it reflects the information of the width.

When at 275-295 nm, the relative intensity of band A2 is above 70%, and the wavelength range is above the central location of band A2, so the slopes of log-transformed band A2 nearly decide *S*275-295, and *S*275-295 reflects the information of the width of band A2. It’s similar with *S*380-443, and *S*380-443 reflects the information of the width of band A3.

**FT-ICR-MS analysis.**

The solid DOM samples were diluted at 100 mg C L-1 with methanol (HPLC) for the analyze of FT-ICR-MS. The Bruker Solarix XR FT-ICR MS equipped with 15 T superconducting magnet was used to analyze the DOM molecular composition. Samples were injected into the ESI source with a flow rate of 120 µL h−1 and an ESI needle voltage of -4.0 kV in negative ionization mode. The flow rate of drying gas was 4.0 min−1 and was at 180 °C. Mass spectra were collected 300 scans, with an ion accumulation time of 0.2 s, and a range of 100-1,600 m/z. An in-house mass reference list was used for internal calibration. The peaks with SNR (Signal to Noise Ratio) above 6 were considered. Formulae were assigned to peaks with elemental combinations of C1-100H1-250O1-100N0-3S0-1. The range of H/C was restricted ≤ 2.2, and the range of O/C was restricted ≤ 1.2. When there were multiple formulae assigned to one peak, the formulae with less N, S atoms were selected. The works were done with self-compiled program by MATLAB 2016b.

**Supplementary** **Figs. 1 to 6**


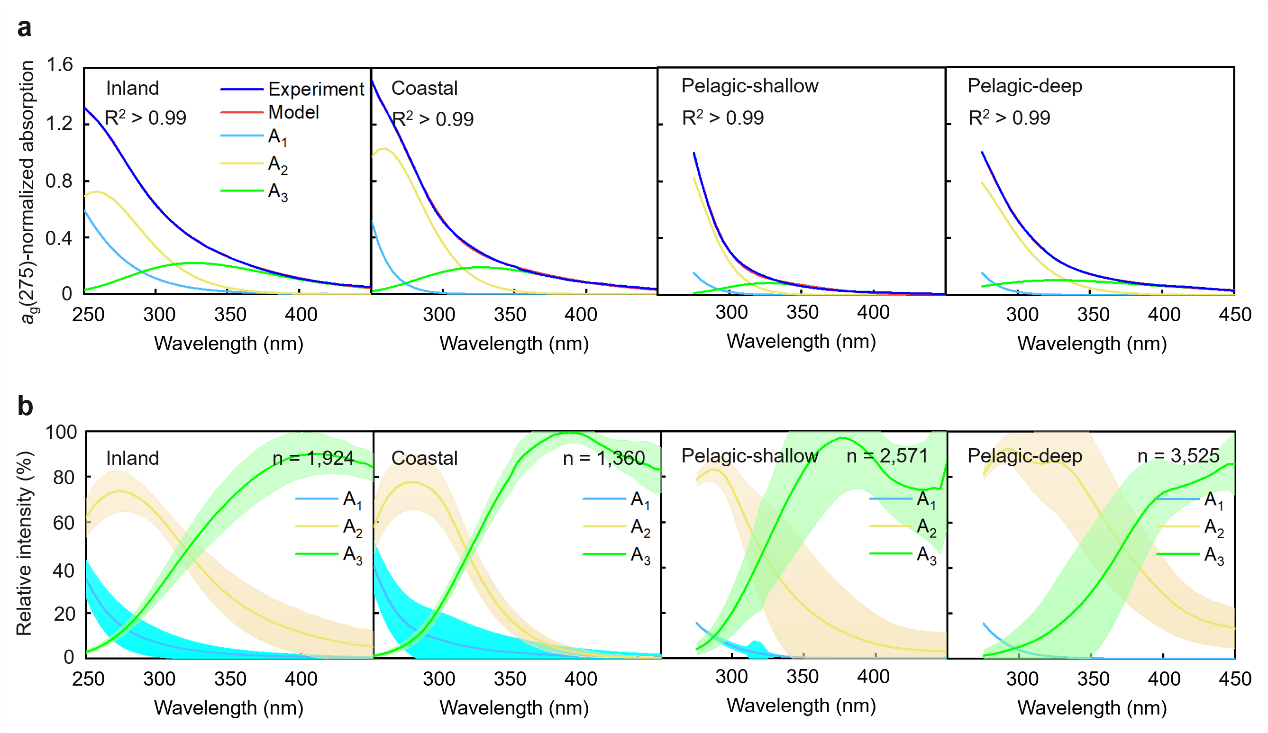


**Supplementary Fig. 1 | Interpretation of the components of the DOM spectrum and their contributions to deconvolution results. a** Deconvolution of DOM spectra using three bands.The four subfigures are representative DOM spectra from various sources, inland, coastal, pelagic-shallow, and pelagic-deep. **b** Average relative intensities of the three bands in samples from various sources. The light background indicates the standard deviation, and the solid line in the middle represents the average values. The influences of the three bands on spectrum are determined by their relative intensities. In 250-275 nm, the spectrum is mainly determined by Band A1 and A2, especially by Band A2. In 275-295 nm, the spectrum is mainly determined by Band A2 and A3, especially by Band A2. In 295-330 nm, the spectrum is mainly determined by Band A2 and A3, and the contribution of Band A2 is a little higher than that of Band A3. In 330-380 nm, the spectrum is mainly determined by Band A2 and A3, and the contribution of Band A3 is a little higher than that of Band A2. In 380-443 nm, the spectrum is dominated by Band A3.


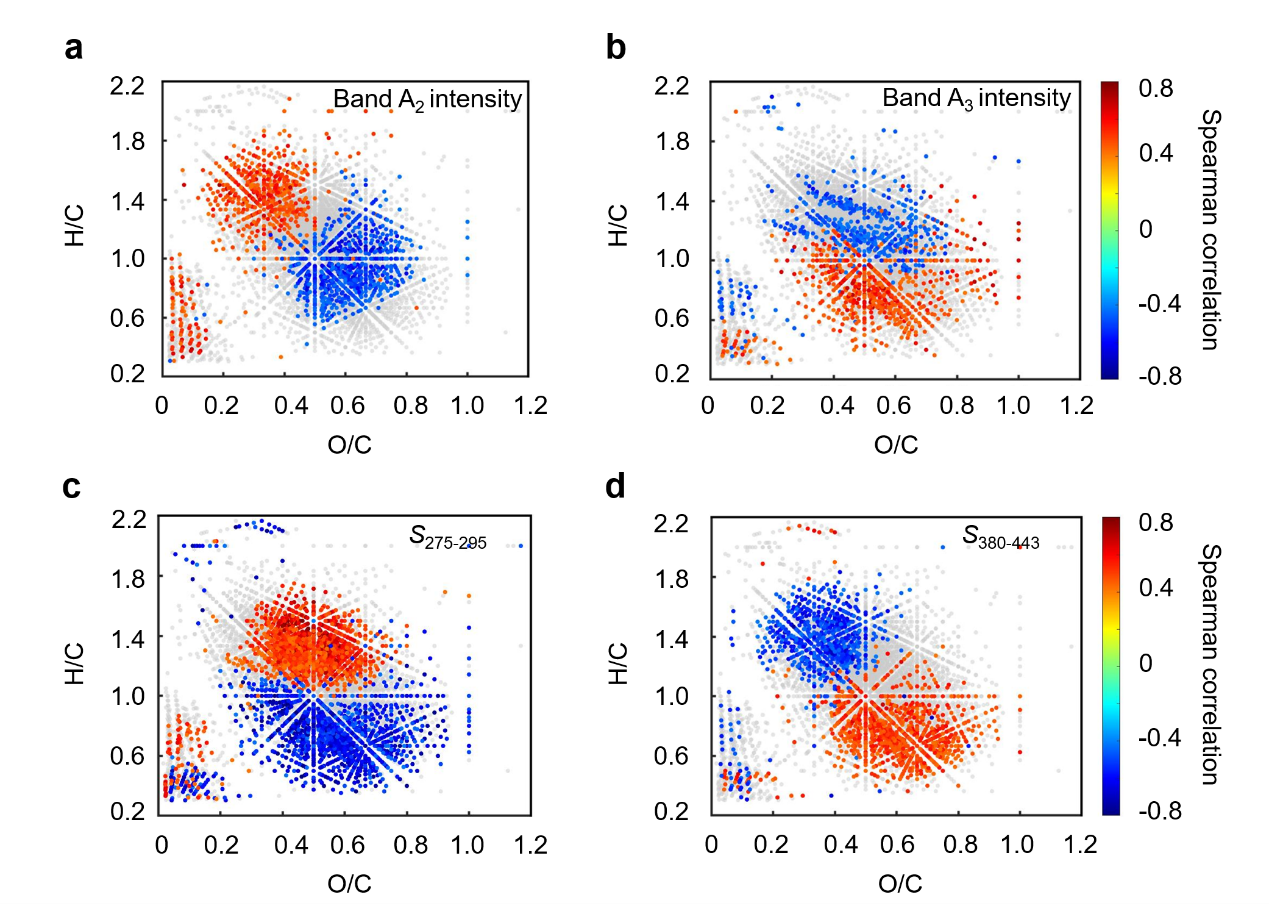


**Supplementary Fig. 2 |** **Spearman correlations between the relative intensities of FT-ICR-MS identified compounds and their optical parameters.** **a** *a*g(275)-normalized intensities of Band A2. **b** *a*g(275)-normalized intensities of Band A3. **c** S275-295. **d** S380-443. Intensities of Band A2 and A3 were gotten by DOM spectra deconvolution with three gaussian bands*. a*g(275) is absorption coefficients at wavelength 275 nm. *S*275-295 and *S*380-443 are the spectral slopes in the wavelength range 275-295 and 380-443 nm, respectively. The compounds denoted by blue or red color are statistically significant (P < 0.05). The color indicates the direction and strength of the correlation (red, positive; blue, negative). The gray points in the background denote the compounds which were not statistically significant (P ≥ 0.05). Both the relative intensities of Band A2 and *S*275-295 values are positively associated with low O/C (0.2-0.5) and high H/C (1.0-1.8) compounds, which are primarily phenolic or highly unsaturated aliphatic compounds, and some are aliphatic compounds. The relative intensities of Band A3 and *S*380-443 are positively associated with high O/C (0.4-1.0) and low H/C (0.3-1.0) compounds, which are mainly vascular plant-derived polyphenols, such as lignin- and tannin-like compounds.


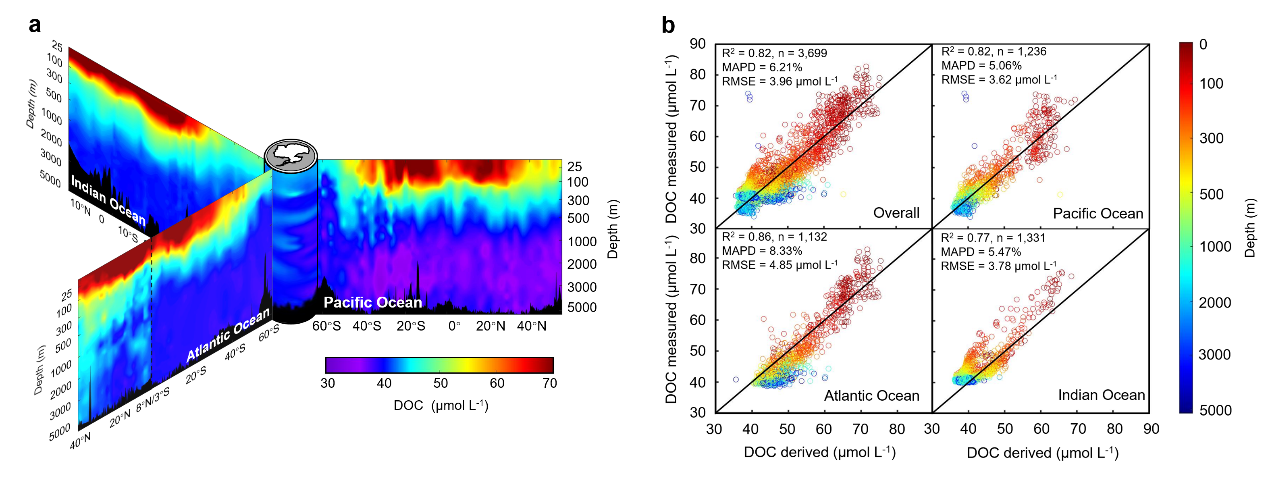


**Supplementary Fig. 3 |** **Evaluation of the performance of the DOCUVFW algorithm applied to the data for the central Pacific, central Atlantic, and eastern Indian oceans on CLIVAR lines P16, A20/A22-A16, and I8/I9, respectively.** **a** Distributions of DOC (µmol L-1) measured. **b** Comparison of the DOC measured and derived using DOCUVFW algorithm. The black lines in subfigures are 1-to-1 lines.


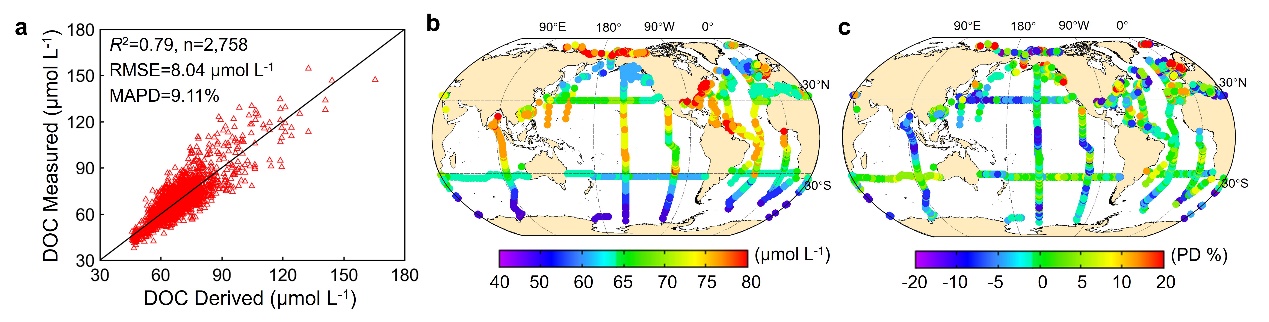


**Supplementary Fig. 4 |** **Validation of the satellite-derived DOC results.** **a** Comparison of the satellite-retrieved and measured DOC using 2,758 validation data sets. The black line is 1-to-1 line. **b** Geographic distribution of the satellite-derived DOC data. **c** Geographic distribution of the percent deviation of DOC results ( ).
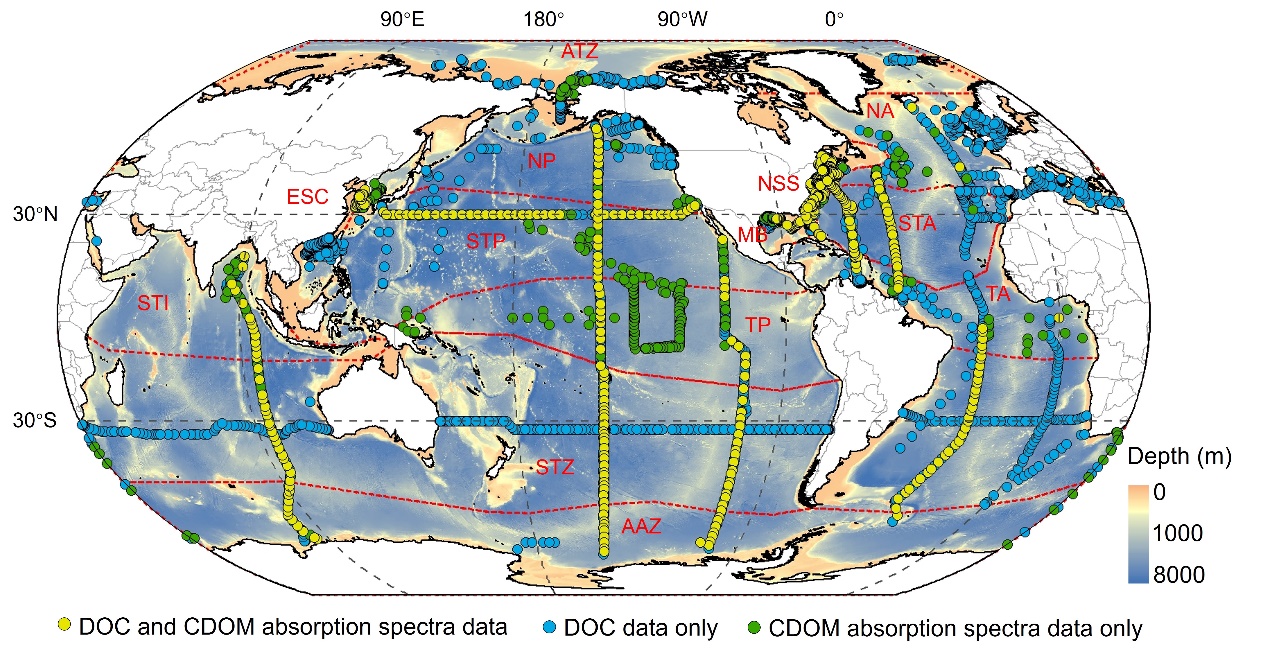


**Supplementary Fig. 5 | Distribution of stations of the DOC and CDOM absorption data.** The background was seafloor topography data (ETOPO1 Global Relief Model v4.3.1 1′ × 1′). The global ocean is regionalized into 13 distinct regions (red dotted lines) according to physical forcing (e.g., temperature and salinity)2,3: Arctic Zone (ATZ), Antarctic Zone (AAZ), North Pacific (NP), Sub-Tropical Pacific (STP), Tropical Pacific (TP), North Atlantic (NA), Sub-Tropical Atlantic (STA), Tropical Atlantic (TA), Sub-Tropical Indian (STI), South Sub-Tropical Zone (STZ), East Sea of China (ESC), Northwestern Sargasso Sea (NSS) and Mexico Bay (MB).


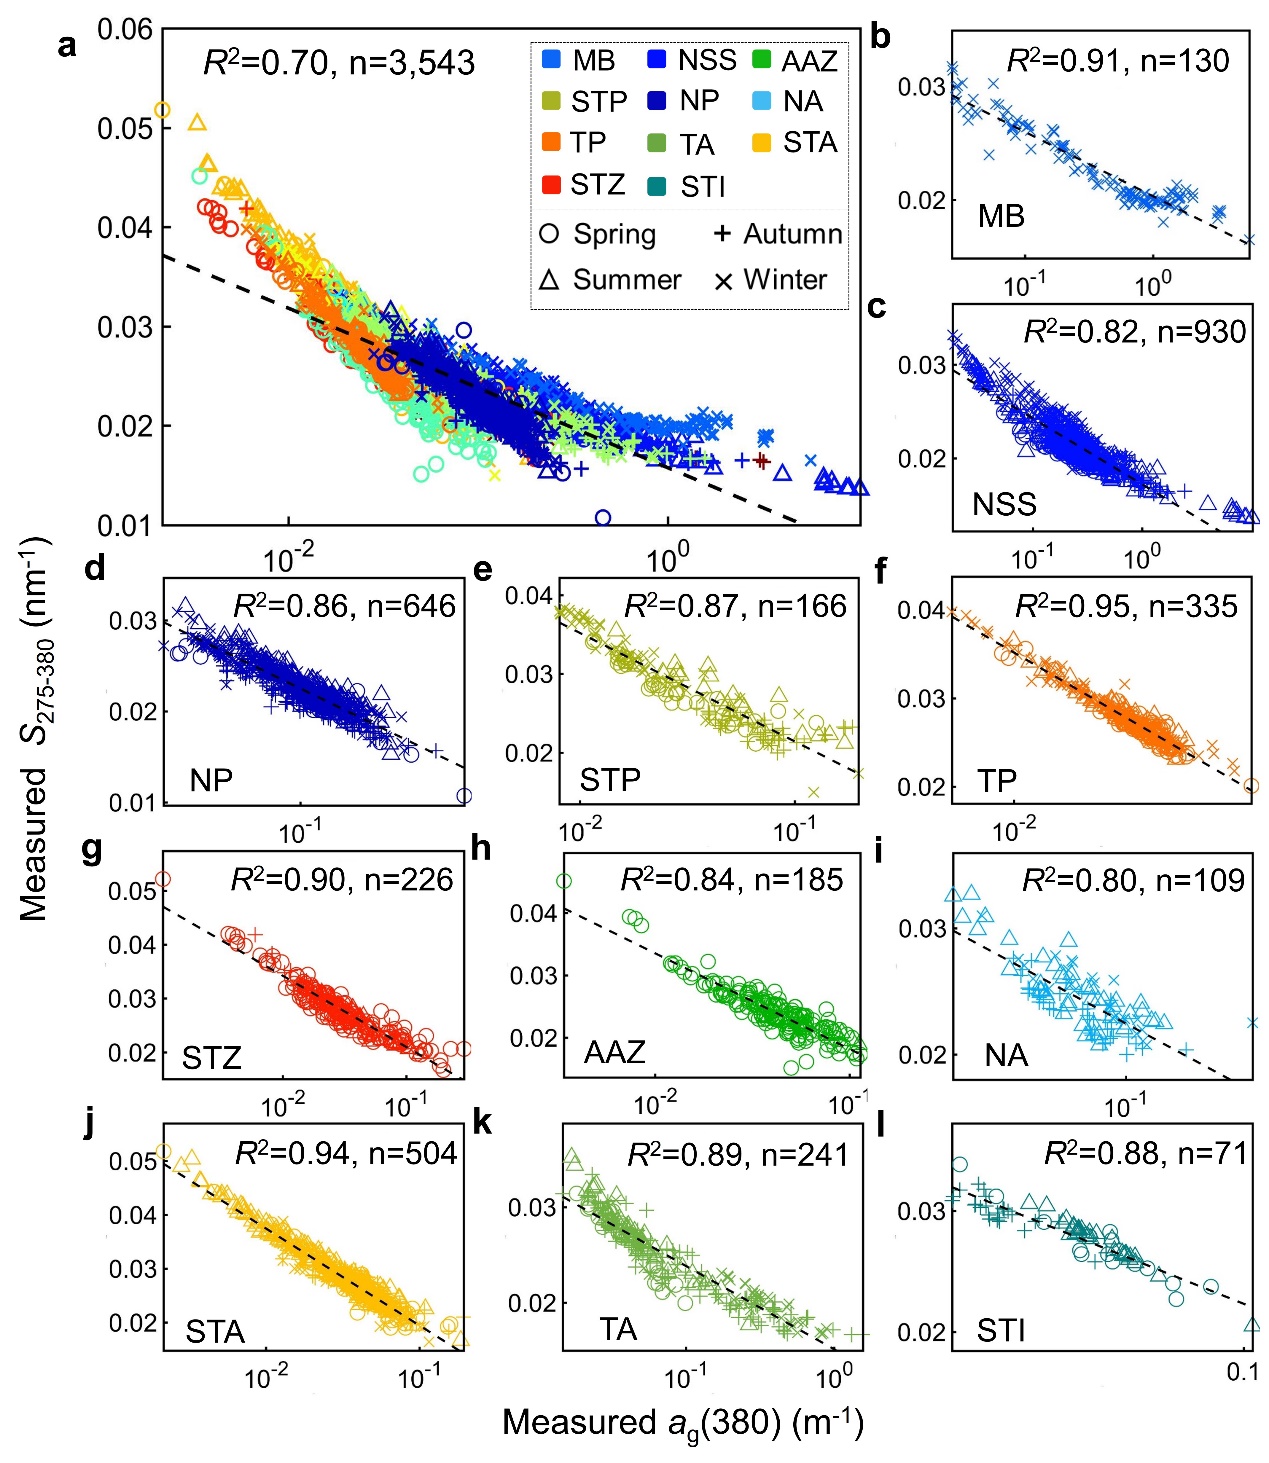


**Supplementary Fig. 6 | The relationships between *a*g(380) and *S*275-380 in global and distinct regions. a** The global-scale relationship between ln(*a*g(380)) and *S*275-380. Colors indicate different regions. Symbols indicate different seasons. **b-l** The regional-scale relationships between *a*g(380) and S275-380 in MB (**b**), NSS (**c**), NP (**d**),STP (**e**), TP (**f**), STZ (**g**), AAZ (**h**), NA (**i**), STA (**j**),TA (**k**) and STI (**l**). The black solid lines are the fitted line using least squares minimization fitting. Regional-scale relationships are obvious different, and there are stronger correlations (R2 ≥ 0.8) than global-scale relationship. In addition, seasonal differences on regional-scale relationships are almost negligible (Supplementary Table 3).

**Supplementary Tables 1 to 3**

**Supplementary Table 1 | Molar absorption coefficients of model compounds predicted by quantum chemistry calculations.** Compounds from No. 1 to 41 (Type-1) only have Band A1; Compounds from No.42 to 128 (type-2) have both Band A1 and A2; Compounds from No.129 to 204 (type-3) have Band A1, A2, and A3.

| No. | Name | | Formula | Structure | Wavelength (nm) | Epsilon  (L-1 cm-1 mol-1) |
| --- | --- | --- | --- | --- | --- | --- |
| **Type-1** | | | | | | |
| 1 | Acetic acid | | C2H4O2 |  | 208.56 | 368.0 |
| 2 | (E)-but-2-enoic acid | | C4H6O2 |  | 205.86 | 331518.2 |
| 3 | 2-methylene-3-oxocyclopentane-1-carboxylic acid | | C7H8O3 |  | 190.68 | 17366.3 |
| 196.59 | 6643.5 |
| 202.25 | 9440.7 |
| 216.63 | 1748.3 |
| 224.60 | 228326.0 |
| 246.13 | 26340.8 |
| 351.05 | 466.2 |
| 4 | (E)-4-oxopent-2-enoic acid | | C5H6O3 |  | 201.93 | 371.1 |
| 209.26 | 16203.8 |
| 223.37 | 715934.8 |
| 375.36 | 123.7 |
| 5 | 2,5,5,8a-tetramethyl-3-oxodecahydronaphthalene-1-carboxylic acid | | C15H24O3 |  | 196.30 | 2479.7 |
| 196.88 | 286.1 |
| 203.54 | 95.4 |
| 225.41 | 6580.7 |
| 285.28 | 286.1 |
| 6 | 2,5,5,8a-tetramethyl-3-oxo-3,4,4a,5,6,7,8,8a-octahydronaphthalene-1-carboxylic acid | | C15H22O3 |  | 191.18 | 7896.2 |
| 191.79 | 493.5 |
| 194.32 | 12091.0 |
| 195.22 | 7896.2 |
| 207.96 | 61318.6 |
| 211.31 | 15915.7 |
| 212.64 | 987.0 |
| 224.83 | 25662.5 |
| 226.90 | 2344.2 |
| 238.97 | 91792.8 |
| 249.53 | 180131.0 |
| 339.02 | 246.8 |
| 7 | 6-ethyl-2-methyl-3-oxocyclohexane-1-carboxylic acid | | C10H16O3 |  | 191.12 | 18551.1 |
| 201.90 | 181.9 |
| 222.42 | 8548.1 |
| 286.71 | 181.9 |
| 8 | 5-hydroxy-2-methyl-3-oxocyclopent-1-ene-1-carboxylic acid | | C7H8O4 |  | 199.56 | 19652.4 |
| 203.14 | 126.8 |
| 210.86 | 59591.1 |
| 246.17 | 456822.8 |
| 274.17 | 3803.7 |
| 295.65 | 380.4 |
| 368.34 | 507.2 |
| 9 | Acrylic acid | | C3H4O2 |  | 195.19 | 244119.1 |
| 10 | Methacrylic acid | | C4H6O2 |  | 208.98 | 180189.8 |
| 11 | 4-hydroxy-2-methylenebutanoic acid | | C5H8O3 |  | 209.93 | 122589.8 |
| 230.33 | 21673.3 |
| 252.06 | 203.2 |
| 12 | (E)-2-methylbut-2-enoic acid | | C5H8O2 |  | 219.09 | 253529.5 |
| 13 | 3-methylbut-2-enoic acid | | C5H8O2 |  | 213.17 | 248442.6 |
| 213.17 | 25651.3 |
| 14 | 2,3-dimethylbut-2-enoic acid | | C6H10O2 |  | 242.44 | 46338.5 |
| 219.39 | 71563.0 |
| 15 | (E)-3-(ethoxycarbonyl)-5-hydroxy-4-methylpent-3-enoic acid | | C9H14O5 |  | 235.07 | 68563.0 |
| 200.46 | 2923.8 |
| 216.20 | 6797.8 |
| 223.74 | 10160.2 |
| 231.61 | 162343.7 |
| 16 | cyclopent-1-ene-1-carboxylic acid | | C6H8O2 |  | 242.95 | 186730.0 |
| 229.88 | 3410.9 |
| 17 | 2-methylcyclopent-1-ene-1-carboxylic acid | | C7H10O2 |  | 248.76 | 144743.1 |
| 231.29 | 59173.8 |
| 18 | 2-cyclohexylideneacetic acid | | C8H12O2 |  | 241.67 | 1109.2 |
| 199.13 | 275573.4 |
| 217.88 | 53034.9 |
| 19 | 2-cyano-2-cyclohexylideneacetic acid | | C9H11NO2 |  | 244.22 | 9147.1 |
| 191.80 | 951.3 |
| 193.84 | 38930.3 |
| 202.80 | 56126.9 |
| 205.93 | 2488.0 |
| 212.58 | 191724.2 |
| 229.28 | 116424.9 |
| 20 | (E)-but-2-enamide | | C4H7NO |  | 248.11 | 344391.8 |
| 201.29 | 64501.9 |
| 21 | (Z)-but-2-enamide | | C4H7NO |  | 216.30 | 327785.1 |
| 202.86 | 40529.3 |
| 22 | cyclopent-1-ene-1-carboxamide | | C6H9NO |  | 212.37 | 89361.3 |
| 204.58 | 165251.5 |
| 226.44 | 2680.1 |
| 23 | cyclohex-1-ene-1-carboxamide | | C7H11NO |  | 255.12 | 88610.9 |
| 201.72 | 170660.6 |
| 218.42 | 2610.4 |
| 24 | cyclohept-1-ene-1-carboxamide | | C8H12NO |  | 249.66 | 74029.5 |
| 205.10 | 194177.0 |
| 225.67 | 3987.4 |
| 25 | 1H-pyrrole-3-carboxylic acid | | C5H5NO2 |  | 256.16 | 153104.8 |
| 212.98 | 45116.9 |
| 26 | Alanine | | C3H7NO2 |  | 245.79 | 351.4 |
| 27 | Asparagine | | C4H8N2O3 |  | 205.29 | 1269.5 |
| 198.57 | 952.1 |
| 210.47 | 571.3 |
| 28 | Aspartic acid | | C4O7NO4 |  | 244.89 | 365.1 |
| 205.34 | 678.0 |
| 29 | Cysteine | | C3H7NOS |  | 211.90 | 7871.5 |
| 191.46 | 3472.7 |
| 196.09 | 7871.5 |
| 197.79 | 2430.9 |
| 213.36 | 1099.7 |
| 30 | Galacturonic acid | | C6H10O7 |  | 225.40 | 1085.5 |
| 31 | Gluconic acid | | C6H12O7 |  | 208.90 | 169.2 |
| 195.43 | 1409.6 |
| 32 | Glutamic acid | | C5H9NO4 |  | 204.21 | 2350.9 |
| 190.54 | 218.7 |
| 209.48 | 1585.5 |
| 33 | Glycine | | C2H5NO2 |  | 212.57 | 170.5 |
| 34 | Isoleucine | | C6H13NO2 |  | 206.36 | 286.1 |
| 35 | Methionine | | C5H11NO2S |  | 218.22 | 154.4 |
| 192.42 | 2239.4 |
| 212.80 | 154.4 |
| 221.45 | 77.2 |
| 229.71 | 154.4 |
| 36 | Proline | | C5H9NO2 |  | 266.43 | 6610.0 |
| 201.67 | 3966.0 |
| 203.57 | 5914.2 |
| 37 | Serine | | C3H7NO3 |  | 244.94 | 877.7 |
| 38 | Stearic acid | | C18H36O2 |  | 204.96 | 196.1 |
| 39 | Threonine | | C4H9NO3 |  | 210.76 | 734.2 |
| 40 | Thymine | | C5H6N2O2 |  | 213.51 | 67.2 |
| 193.30 | 51227.2 |
| 197.27 | 139496.5 |
| 201.26 | 67.2 |
| 204.62 | 117849.4 |
| 41 | Valine | | C5H11NO2 |  | 249.17 | 450.3 |
| **Type-2** | | | | | | |
| 42 | Phenol | | C6H6O |  | 211.30 | 29387.2 |
| 244.39 | 28209.3 |
| 43 | Pyrocatechol | | C6H6O2 |  | 192.27 | 306434.4 |
| 217.32 | 24775.5 |
| 249.11 | 38402.1 |
| 44 | Resorcinol | | C6H6O2 |  | 193.72 | 128.9 |
| 196.51 | 270194.5 |
| 214.73 | 5155.2 |
| 247.10 | 29319.9 |
| 45 | Hydroquinone | | C6H6O2 |  | 208.53 | 220.1 |
| 215.81 | 68756.1 |
| 269.45 | 57822.7 |
| 46 | Benzene-1,3,5-triol | | C6H6O3 |  | 191.26 | 445.7 |
| 195.93 | 368580.6 |
| 195.95 | 368707.9 |
| 47 | Benzene-1,2,4-triol | | C6H6O3 |  | 194.02 | 145.1 |
| 196.75 | 358927.1 |
| 218.34 | 20537.1 |
| 264.59 | 63498.0 |
| 48 | Benzene-1,2,3-triol | | C6H6O3 |  | 195.98 | 415483.7 |
| 197.81 | 339333.4 |
| 222.66 | 18047.6 |
| 245.56 | 2661.7 |
| 49 | p-Cresol | | C7H8O |  | 195.97 | 68.1 |
| 215.56 | 67508.7 |
| 252.62 | 34537.8 |
| 50 | 2-hydroxy-6-phenoxybenzoic acid | | C13H10O4 |  | 190.42 | 2594.0 |
| 197.70 | 264682.9 |
| 198.32 | 68500.5 |
| 204.61 | 146512.3 |
| 207.34 | 214724.6 |
| 210.18 | 10472.0 |
| 210.46 | 12489.6 |
| 227.94 | 1056.8 |
| 233.34 | 3362.6 |
| 237.31 | 11721.0 |
| 238.15 | 5956.6 |
| 239.07 | 191859.1 |
| 247.46 | 2497.9 |
| 254.22 | 5284.1 |
| 287.06 | 124223.2 |
| 51 | 4-hydroxybenzenaminium | | C6H8NO+ |  | 199.11 | 127.2 |
| 215.13 | 53344.3 |
| 245.76 | 22889.1 |
| 52 | 2,4,6-tribromophenol | | C6H3Br3O |  | 191.45 | 178.2 |
| 191.98 | 89.1 |
| 193.84 | 22008.0 |
| 196.44 | 89.1 |
| 199.86 | 623.7 |
| 201.61 | 65578.6 |
| 202.51 | 26819.5 |
| 207.25 | 7039.0 |
| 207.65 | 178.2 |
| 209.73 | 363711.6 |
| 216.58 | 518926.1 |
| 216.60 | 178.2 |
| 222.10 | 534.6 |
| 233.35 | 9088.3 |
| 270.09 | 68162.5 |
| 53 | 7-hydroxychroman-2-one | | C9H8O3 |  | 191.19 | 19048.8 |
| 195.42 | 319312.1 |
| 210.59 | 122800.8 |
| 215.10 | 126866.5 |
| 220.77 | 38323.5 |
| 243.55 | 8282.1 |
| 257.46 | 36968.2 |
| 54 | 1-(2,4-dihydroxyphenyl)ethan-1-one | | C8H8O3 |  | 202.38 | 329123.1 |
| 208.06 | 94.3 |
| 221.62 | 129706.0 |
| 262.33 | 269222.5 |
| 286.13 | 120084.2 |
| 302.57 | 94.3 |
| 55 | 1-(4-hydroxyphenyl)ethan-1-one | | C8H8O2 |  | 190.95 | 418235.3 |
| 220.52 | 184332.2 |
| 258.83 | 4254.6 |
| 267.18 | 416652.2 |
| 315.60 | 98.9 |
| 56 | 1-(2,4,6-trihydroxyphenyl)ethan-1-one | | C8H8O4 |  | 192.62 | 1752.8 |
| 199.42 | 74690.4 |
| 202.55 | 1460.7 |
| 212.11 | 143148.5 |
| 224.58 | 47910.9 |
| 273.93 | 273150.7 |
| 298.80 | 30187.8 |
| 306.74 | 7595.6 |
| 57 | 2-hydroxybenzaldehyde | | C7H6O2 |  | 192.41 | 807.3 |
| 197.57 | 214941.0 |
| 201.60 | 100.9 |
| 208.48 | 177099.3 |
| 251.77 | 263883.0 |
| 313.95 | 91425.6 |
| 326.70 | 201.8 |
| 58 | 4-hydroxybenzaldehyde | | C7H6O2 |  | 190.17 | 407505.3 |
| 221.14 | 197551.9 |
| 260.32 | 11045.1 |
| 268.30 | 401013.9 |
| 317.44 | 193.8 |
| 59 | 4-formylbenzoic acid | | C8H6O3 |  | 193.11 | 197884.3 |
| 201.27 | 180966.1 |
| 206.01 | 11667.7 |
| 209.25 | 350.0 |
| 219.46 | 233.4 |
| 258.50 | 584902.0 |
| 277.37 | 116.7 |
| 285.29 | 47020.8 |
| 350.15 | 116.7 |
| 60 | 5-hydroxy-2,3-dihydro-1H-inden-1-one | | C9H8O2 |  | 196.58 | 487112.0 |
| 221.39 | 242509.8 |
| 228.76 | 199.3 |
| 255.55 | 153436.8 |
| 267.95 | 227763.9 |
| 313.57 | 99.6 |
| 61 | Benzoic acid | | C7H6O2 |  | 194.43 | 143725.5 |
| 231.08 | 179160.9 |
| 250.69 | 68.4 |
| 253.16 | 18880.6 |
| 62 | 2-methylbenzoic acid | | C8H8O2 |  | 192.09 | 369027.8 |
| 196.46 | 211744.6 |
| 234.50 | 174469.8 |
| 250.16 | 74.4 |
| 261.01 | 34968.4 |
| 63 | 4-methylbenzoic acid | | C8H8O2 |  | 202.63 | 149729.6 |
| 241.76 | 263595.5 |
| 248.16 | 71.3 |
| 253.78 | 13903.5 |
| 64 | 2-hydroxybenzoic acid | | C7H6O3 |  | 190.41 | 248014.9 |
| 200.57 | 283189.3 |
| 229.86 | 137968.0 |
| 248.11 | 78.0 |
| 272.90 | 66761.2 |
| 65 | 3-hydroxybenzoic acid | | C7H6O3 |  | 205.69 | 438603.8 |
| 235.58 | 95902.4 |
| 251.48 | 84.3 |
| 287.42 | 67224.5 |
| 66 | 2-hydroxy-4-methoxybenzoic acid | | C8H8O4 |  | 191.07 | 865.1 |
| 196.18 | 393633.0 |
| 217.17 | 174834.4 |
| 247.30 | 196069.4 |
| 266.21 | 146678.4 |
| 67 | 2,6-dihydroxybenzoic acid | | C7H6O4 |  | 190.78 | 87180.3 |
| 199.27 | 13485.0 |
| 209.09 | 206999.6 |
| 217.27 | 171.8 |
| 227.20 | 15546.4 |
| 248.30 | 100235.9 |
| 287.92 | 47154.7 |
| 68 | 2,6-dimethoxybenzoic acid | | C9H10O4 |  | 200.24 | 216811.7 |
| 205.60 | 220916.2 |
| 248.26 | 166188.8 |
| 255.23 | 7388.2 |
| 289.31 | 97597.2 |
| 69 | 3,4,5-trihydroxybenzoic acid | | C7H6O5 |  | 193.89 | 850.7 |
| 201.27 | 383850.6 |
| 217.15 | 208344.4 |
| 244.02 | 85.1 |
| 276.33 | 233611.2 |
| 283.15 | 22204.1 |
| 70 | 3,5-dihydroxy-4-methoxybenzoic acid | | C8H8O5 |  | 192.16 | 478.9 |
| 197.82 | 287.3 |
| 201.06 | 1149.3 |
| 203.75 | 417949.0 |
| 210.00 | 2107.0 |
| 224.02 | 205814.0 |
| 244.44 | 95.8 |
| 288.36 | 117033.4 |
| 291.15 | 225734.6 |
| 71 | 2,3-dihydroxybenzoic acid | | C7H6O4 |  | 191.15 | 113444.2 |
| 192.38 | 82771.6 |
| 203.42 | 363003.6 |
| 209.66 | 81971.4 |
| 235.64 | 125268.7 |
| 249.66 | 978.0 |
| 284.65 | 62501.0 |
| 72 | 2-aminobenzoic acid | | C7H7NO2 |  | 191.61 | 178585.4 |
| 196.67 | 36301.8 |
| 207.83 | 295449.6 |
| 213.93 | 56117.6 |
| 234.00 | 71629.1 |
| 251.16 | 4629.1 |
| 268.09 | 37926.0 |
| 73 | Phthalic acid | | C8H6O4 |  | 198.76 | 229637.3 |
| 199.11 | 105944.4 |
| 208.60 | 14855.7 |
| 213.96 | 140268.8 |
| 225.87 | 52542.1 |
| 239.86 | 16966.7 |
| 251.17 | 17905.0 |
| 253.70 | 26114.7 |
| 74 | Isophthalic acid | | C8H6O4 |  | 191.37 | 43612.1 |
| 211.96 | 468889.9 |
| 215.69 | 302634.0 |
| 221.24 | 80.3 |
| 234.83 | 71241.1 |
| 257.23 | 80.3 |
| 260.12 | 13332.6 |
| 75 | 2,3-dihydrobenzofuran-5-ol | | C8H8O2 |  | 190.40 | 356.6 |
| 194.76 | 514770.0 |
| 208.75 | 1247.9 |
| 212.26 | 89.1 |
| 223.84 | 72558.1 |
| 284.14 | 90029.0 |
| 76 | 2,2'-dihydroxybiphenyl | | C12H10O2 |  | 193.48 | 90.4 |
| 194.44 | 451.8 |
| 198.36 | 33707.5 |
| 200.63 | 379819.3 |
| 202.36 | 270744.4 |
| 208.24 | 451.8 |
| 212.35 | 23315.1 |
| 221.49 | 87205.7 |
| 224.26 | 60275.9 |
| 237.31 | 48527.9 |
| 238.82 | 1717.0 |
| 256.32 | 6325.8 |
| 269.26 | 186069.0 |
| 77 | aniline | | C6H7N |  | 214.88 | 1104.5 |
| 228.50 | 173176.0 |
| 273.17 | 46706.2 |
| 78 | 3-aminophenol | | C6H7NO |  | 191.79 | 499951.8 |
| 207.03 | 620.0 |
| 207.62 | 231879.7 |
| 215.57 | 620.0 |
| 227.00 | 94937.4 |
| 266.26 | 50219.9 |
| 79 | Benzene-1,2-diamine | | C6H8N2 |  | 199.01 | 544907.6 |
| 213.82 | 186867.1 |
| 214.16 | 686.1 |
| 241.67 | 106340.2 |
| 256.93 | 2744.3 |
| 283.35 | 95963.4 |
| 80 | Benzene-1,3-diamine | | C6H8N2 |  | 204.14 | 650785.0 |
| 204.14 | 13133.2 |
| 217.67 | 1631.4 |
| 224.65 | 218695.7 |
| 235.70 | 2691.9 |
| 273.09 | 56366.6 |
| 81 | 4-aminobenzonitrile | | C7H6N2 |  | 191.88 | 1320.5 |
| 202.83 | 247.6 |
| 210.52 | 145337.9 |
| 262.56 | 465147.2 |
| 272.75 | 29628.8 |
| 82 | 4-nitrophenol | | C6H5NO3 |  | 195.63 | 85223.8 |
| 200.41 | 106271.9 |
| 230.74 | 62009.1 |
| 273.84 | 309.5 |
| 289.81 | 9079.5 |
| 311.89 | 361324.4 |
| 83 | 8-hydroxyisochroman-1-one | | C9H8O3 |  | 190.55 | 8354.1 |
| 198.28 | 199849.0 |
| 200.15 | 131530.9 |
| 211.26 | 199849.0 |
| 240.48 | 90688.6 |
| 247.88 | 41120.8 |
| 298.08 | 89667.5 |
| 84 | 5-hydroxy-2-methyl-4H-chromen-4-one | | C5H4O3 |  | 199.04 | 34223.8 |
| 205.92 | 101618.5 |
| 223.06 | 1790.2 |
| 229.61 | 548213.3 |
| 237.48 | 188178.5 |
| 258.74 | 4949.3 |
| 299.92 | 97511.6 |
| 85 | 6-hydroxy-2-methyl-4H-chromen-4-one | | C10H8O3 |  | 190.35 | 310.4 |
| 197.38 | 157252.4 |
| 199.29 | 116801.3 |
| 209.00 | 103.5 |
| 220.25 | 209290.5 |
| 233.67 | 309538.9 |
| 242.69 | 126422.7 |
| 257.11 | 57210.9 |
| 309.99 | 109455.9 |
| 86 | 7-hydroxy-2,5-dimethyl-4H-chromen-4-one | | C10H8O3 |  | 192.74 | 347741.3 |
| 207.84 | 13739.0 |
| 211.22 | 217949.8 |
| 223.30 | 192865.8 |
| 226.28 | 187349.4 |
| 233.68 | 167365.5 |
| 270.65 | 167157.3 |
| 276.59 | 98150.3 |
| 87 | 5,7-dihydroxy-2-(3-hydroxy-4-methoxyphenyl)chroman-4-one | | C15H10O7 |  | 192.09 | 359948.9 |
| 195.14 | 337920.9 |
| 195.58 | 12621.4 |
| 196.87 | 68227.2 |
| 200.63 | 10954.4 |
| 202.90 | 158958.6 |
| 205.79 | 220041.5 |
| 206.19 | 597255.6 |
| 214.82 | 42746.2 |
| 216.70 | 26433.6 |
| 218.00 | 6667.9 |
| 219.62 | 12383.3 |
| 221.08 | 136216.2 |
| 222.40 | 23337.7 |
| 224.29 | 15836.3 |
| 236.11 | 14407.5 |
| 249.38 | 96923.1 |
| 262.41 | 11192.6 |
| 273.44 | 368045.7 |
| 290.81 | 2024.2 |
| 307.82 | 48342.5 |
| 320.92 | 74061.6 |
| 88 | 3,5,7-trihydroxy-2-(4-hydroxyphenyl)chroman-4-one | | C16H12O7 |  | 190.02 | 412045.1 |
| 192.24 | 49555.0 |
| 192.98 | 101016.0 |
| 197.20 | 7862.1 |
| 204.14 | 577863.8 |
| 211.60 | 20489.1 |
| 213.09 | 68972.0 |
| 214.37 | 120433.0 |
| 218.54 | 49912.4 |
| 221.19 | 341286.3 |
| 223.74 | 14533.0 |
| 226.75 | 17391.9 |
| 235.43 | 41454.7 |
| 235.99 | 3692.8 |
| 245.10 | 36570.6 |
| 251.36 | 5598.8 |
| 277.56 | 318772.1 |
| 286.81 | 43956.2 |
| 307.11 | 29661.5 |
| 324.12 | 62420.2 |
| 89 | 6-hydroxy-4-methoxybenzofuran-3(2H)-one | | C15H12O6 |  | 199.08 | 538984.7 |
| 213.82 | 80706.2 |
| 216.27 | 78266.5 |
| 264.93 | 350344.9 |
| 298.18 | 72899.1 |
| 303.70 | 292.8 |
| 90 | 4-hydroxy-6-meThoxybenzofuran-3(2H)-one | | C9H8O4 |  | 195.19 | 97.8 |
| 200.36 | 606106.3 |
| 213.08 | 50769.7 |
| 219.54 | 60845.4 |
| 271.61 | 410266.3 |
| 291.72 | 391.3 |
| 305.29 | 54291.3 |
| 91 | 2,3-dimethylindolin-2-ol | | C11H13NO |  | 192.15 | 4052.5 |
| 195.38 | 481062.0 |
| 198.98 | 149519.3 |
| 214.81 | 1182.0 |
| 233.87 | 124866.7 |
| 272.97 | 55552.6 |
| 92 | Pyridine | | C5H5N |  | 197.11 | 14814.3 |
| 224.47 | 34359.2 |
| 251.28 | 2676.5 |
| 93 | 3-methylpyridine | | C6H7N |  | 202.82 | 38911.2 |
| 232.61 | 50771.1 |
| 253.35 | 3131.6 |
| 94 | 3-(1-methylpyrrolidin-2-yl)pyridine | | C10H14N2 |  | 203.63 | 22261.1 |
| 205.36 | 97369.6 |
| 229.73 | 54566.8 |
| 238.65 | 90.5 |
| 250.80 | 3167.2 |
| 271.57 | 2895.7 |
| 284.41 | 5701.0 |
| 95 | 2-methoxypyridine | | C6H7NO |  | 207.07 | 96940.9 |
| 210.79 | 66.3 |
| 238.03 | 2254.4 |
| 248.64 | 64052.6 |
| 96 | 3-methoxypyridine | | C6H7NO |  | 207.07 | 96940.9 |
| 210.79 | 66.3 |
| 238.03 | 2254.4 |
| 248.64 | 64052.6 |
| 97 | 4-methoxypyridine | | C6H7NO |  | 210.92 | 59921.6 |
| 227.43 | 1814.0 |
| 230.74 | 3386.1 |
| 233.83 | 544.2 |
| 98 | Pyridin-2-amine | | C5H6N2 |  | 199.58 | 2144.8 |
| 208.21 | 221.9 |
| 220.51 | 195912.8 |
| 238.03 | 2440.6 |
| 274.44 | 58204.4 |
| 99 | Pyridin-3-amine | | C5H6N2 |  | 207.85 | 1091.3 |
| 214.24 | 155.9 |
| 228.11 | 195965.3 |
| 249.07 | 3195.9 |
| 283.74 | 62281.7 |
| 100 | Pyridin-4-amine | | C5H6N2 |  | 193.92 | 157297.8 |
| 195.55 | 843.2 |
| 221.78 | 2789.2 |
| 222.19 | 120973.3 |
| 251.32 | 18162.2 |
| 101 | Pyrimidine | | C4H4N2 |  | 193.02 | 56867.8 |
| 214.63 | 60689.3 |
| 102 | 1-methylpyrimidin-4(1H)-one | | C5H6N2O |  | 199.20 | 138107.6 |
| 239.49 | 92.8 |
| 277.57 | 37125.7 |
| 319.38 | 92.8 |
| 103 | 4-methoxypyrimidine | | C5H6N2O |  | 218.31 | 173234.9 |
| 234.37 | 51794.2 |
| 104 | Pyrimidine-2,4(1H,3H)-dione | | C4H4N2O2 |  | 202.92 | 214576.8 |
| 203.18 | 537.8 |
| 225.01 | 10957.4 |
| 105 | 1,3,6-trimethylpyrimidine-2,4(1H,3H)-dione | | C7H10N2O2 |  | 194.63 | 118664.4 |
| 202.49 | 64656.0 |
| 219.36 | 67458.0 |
| 231.35 | 151167.6 |
| 237.18 | 8125.8 |
| 252.44 | 630.4 |
| 106 | 2-methoxypyrimidin-4(3H)-one | | C5H6N2O2 |  | 191.19 | 230.9 |
| 202.11 | 60178.4 |
| 257.33 | 27703.6 |
| 280.32 | 146444.3 |
| 107 | Pyrazine | | C4H4N2 |  | 248.66 | 120714.7 |
| 108 | Pyrazin-2-ol | | C4H4N2O |  | 196.63 | 167534.5 |
| 286.71 | 144960.5 |
| 109 | 1H-Pyrrole-3-carboxylicacid | | C5H5NO2 |  | 212.98 | 153105.0 |
| 245.79 | 45180.6 |
| 110 | 3,4-dimethoxybenzoic acid | | C9H10O4 |  | 191.14 | 3954.5 |
| 199.79 | 11960.0 |
| 202.23 | 276429.6 |
| 228.52 | 560189.5 |
| 260.05 | 75425.0 |
| 299.67 | 150657.0 |
| 111 | 3-furoic acid | | C5H4O3 |  | 198.93 | 56990.4 |
| 243.06 | 42727.4 |
| 112 | 4-hydroxy-benzoic acid | | C7H6O3 |  | 212.67 | 153112.9 |
| 251.54 | 8448.6 |
| 251.67 | 269938.5 |
| 113 | 5-hydroxy-isophthalic acid | | C8H6O5 |  | 191.16 | 86826.8 |
| 215.95 | 586057.5 |
| 230.65 | 213915.7 |
| 253.52 | 4797.6 |
| 258.23 | 94.1 |
| 299.10 | 82311.4 |
| 114 | Catechin | | C15H14O6 |  | 190.86 | 84554.3 |
| 191.22 | 71773.8 |
| 191.76 | 2877.7 |
| 193.68 | 6432.6 |
| 195.17 | 46212.9 |
| 195.33 | 189168.1 |
| 196.57 | 165638.4 |
| 198.58 | 72112.4 |
| 201.40 | 142108.8 |
| 202.40 | 758195.8 |
| 203.93 | 431912.6 |
| 211.69 | 1692.8 |
| 213.93 | 8717.8 |
| 217.73 | 10579.9 |
| 222.20 | 22429.3 |
| 227.03 | 78206.4 |
| 229.59 | 5586.2 |
| 234.28 | 7532.9 |
| 237.70 | 2031.3 |
| 240.51 | 1523.5 |
| 248.69 | 2623.8 |
| 253.07 | 72958.8 |
| 115 | Cyanidin cation | | C4H5N3O3 |  | 190.63 | 2216.3 |
| 196.23 | 69592.0 |
| 201.72 | 4344.0 |
| 206.29 | 58687.7 |
| 207.01 | 152570.4 |
| 210.02 | 8953.9 |
| 215.66 | 8067.3 |
| 227.31 | 405140.4 |
| 269.53 | 78368.5 |
| 278.74 | 442019.7 |
| 116 | Cytosine | | C4H5N3O |  | 190.01 | 667.0 |
| 197.05 | 108193.1 |
| 203.88 | 66.7 |
| 223.14 | 86114.2 |
| 223.30 | 266.8 |
| 234.77 | 867.1 |
| 253.78 | 50694.7 |
| 117 | Dihydroferulic acid | | C10H12O4 |  | 192.29 | 4555.9 |
| 193.56 | 512212.8 |
| 199.40 | 198995.0 |
| 204.08 | 81.4 |
| 209.98 | 244.1 |
| 210.87 | 178981.6 |
| 214.43 | 2033.9 |
| 228.01 | 46942.0 |
| 242.55 | 14806.7 |
| 262.25 | 57843.6 |
| 118 | Estriol | | C18H24O3 |  | 191.40 | 272915.6 |
| 191.86 | 201222.5 |
| 195.49 | 27885.4 |
| 197.79 | 158964.1 |
| 198.59 | 15233.7 |
| 198.97 | 304673.9 |
| 220.59 | 49315.9 |
| 255.31 | 45356.8 |
| 119 | Eugenol | | C10H12O2 |  | 192.09 | 124645.3 |
| 193.93 | 159871.1 |
| 195.13 | 7122.6 |
| 201.78 | 177987.2 |
| 207.62 | 851.6 |
| 209.50 | 270968.0 |
| 216.43 | 13316.1 |
| 242.59 | 86090.4 |
| 256.31 | 48542.0 |
| 120 | Gallic acid | | C7H6O5 |  | 201.06 | 409848.1 |
| 205.15 | 86.0 |
| 214.98 | 205698.3 |
| 273.10 | 231851.5 |
| 285.68 | 32175.3 |
| 121 | Gallocatechin | | C15H14O7 |  | 191.23 | 3764.3 |
| 195.74 | 11794.7 |
| 196.20 | 140699.5 |
| 198.41 | 16730.0 |
| 200.03 | 173741.3 |
| 200.18 | 69680.6 |
| 201.83 | 165376.3 |
| 202.83 | 118030.4 |
| 203.46 | 59224.3 |
| 205.31 | 464091.0 |
| 205.71 | 664098.5 |
| 206.85 | 48433.4 |
| 209.87 | 35802.3 |
| 212.49 | 30532.3 |
| 213.97 | 8197.7 |
| 218.06 | 585.6 |
| 222.04 | 10707.2 |
| 223.35 | 14471.5 |
| 223.60 | 501.9 |
| 226.44 | 10205.3 |
| 229.27 | 62486.7 |
| 230.48 | 19657.8 |
| 235.67 | 920.2 |
| 248.69 | 3262.4 |
| 249.87 | 1254.8 |
| 122 | Histidine | | C6H9N3O2 |  | 196.52 | 101183.2 |
| 198.18 | 15160.4 |
| 202.91 | 255.5 |
| 207.58 | 16693.5 |
| 215.93 | 340.7 |
| 267.47 | 6047.1 |
| 123 | Isophthalic acid | | C8H6O4 |  | 190.93 | 20937.3 |
| 192.45 | 3503.1 |
| 217.00 | 222001.1 |
| 218.88 | 427219.7 |
| 221.63 | 17434.2 |
| 227.14 | 97354.6 |
| 236.69 | 86845.2 |
| 254.34 | 7169.2 |
| 257.90 | 81.5 |
| 267.51 | 29573.0 |
| 124 | Protocatechuic acid | | C7H6O4 |  | 194.95 | 345953.5 |
| 218.27 | 341703.1 |
| 250.93 | 106844.7 |
| 282.46 | 119346.1 |
| 125 | Pyrimidin-4-ol | | C4H4N2O |  | 191.60 | 1469.3 |
| 198.25 | 59345.1 |
| 202.91 | 2938.5 |
| 224.62 | 39031.0 |
| 235.42 | 1852.5 |
| 254.40 | 830.4 |
| 126 | Pyrocatechol | | C6H6O2 |  | 192.27 | 306434.8 |
| 217.32 | 24775.6 |
| 249.11 | 38402.1 |
| 127 | Salicylic acid | | C7H6O3 |  | 190.41 | 248014.9 |
| 200.57 | 283189.3 |
| 229.86 | 137968.0 |
| 248.11 | 78.0 |
| 272.90 | 66761.2 |
| 128 | Tyrosine | | C9H11NO3 |  | 190.02 | 13050.8 |
| 205.90 | 1171.2 |
| 214.57 | 3932.0 |
| 219.22 | 120803.5 |
| 227.19 | 7111.0 |
| 249.60 | 28862.3 |
| 272.65 | 10875.7 |
| **Type-3** | | | | | | |
| 129 | 3,9-dimethyldibenzo[b,d]furan-1,7-diol | | C14H12O3 |  | 192.25 | 98.3 |
| 192.46 | 221599.1 |
| 194.63 | 98.3 |
| 201.01 | 19260.9 |
| 205.20 | 90310.2 |
| 206.20 | 294.8 |
| 211.67 | 133843.9 |
| 212.69 | 196.5 |
| 213.78 | 316921.1 |
| 220.72 | 373426.4 |
| 232.16 | 125294.4 |
| 237.87 | 210101.5 |
| 253.45 | 50609.1 |
| 275.72 | 143867.4 |
| 292.13 | 372640.3 |
| 130 | 7-hydroxy-2H-chromen-2-one | | C9H6O3 |  | 190.08 | 451954.2 |
| 192.34 | 386.2 |
| 194.60 | 649207.4 |
| 208.24 | 174563.8 |
| 220.13 | 11972.3 |
| 243.26 | 54068.4 |
| 280.85 | 5310.3 |
| 307.09 | 406285.7 |
| 131 | 4-hydroxy-2H-chromen-2-one | | C9H6O3 |  | 193.10 | 272311.1 |
| 198.01 | 116729.7 |
| 207.93 | 433567.5 |
| 221.48 | 14405.7 |
| 223.88 | 44526.7 |
| 265.12 | 154097.2 |
| 286.99 | 159335.6 |
| 132 | 2,3,7,8-tetrahydroxychromeno[5,4,3-cde]chromen-5(10H)-one | | C14H8O7 |  | 190.17 | 9948.2 |
| 191.45 | 7825.9 |
| 191.96 | 161957.1 |
| 193.43 | 2785.5 |
| 195.17 | 236104.5 |
| 197.63 | 116593.2 |
| 198.01 | 5438.4 |
| 199.69 | 122429.5 |
| 201.88 | 5968.9 |
| 205.51 | 59158.8 |
| 207.67 | 21090.2 |
| 216.20 | 43639.5 |
| 221.48 | 243134.6 |
| 222.50 | 142193.3 |
| 225.89 | 3183.4 |
| 233.58 | 36211.5 |
| 241.55 | 44435.4 |
| 241.86 | 97094.7 |
| 244.35 | 465311.5 |
| 256.72 | 435997.4 |
| 272.47 | 35681.0 |
| 283.27 | 293406.2 |
| 294.58 | 168987.1 |
| 302.45 | 2122.3 |
| 353.03 | 185302.2 |
| 133 | Tryptophan | | C11H12N2O2 |  | 190.56 | 155690.2 |
| 192.95 | 47407.1 |
| 198.23 | 22861.7 |
| 200.66 | 119714.0 |
| 204.44 | 15241.2 |
| 211.38 | 440044.2 |
| 214.14 | 37659.8 |
| 216.65 | 208945.7 |
| 219.17 | 10810.6 |
| 244.58 | 16747.6 |
| 257.29 | 30216.5 |
| 274.33 | 79661.6 |
| 134 | 2,3-dimethyl-1H-indol-5-ol | | C10H11NO |  | 190.64 | 286765.2 |
| 191.03 | 89.8 |
| 193.27 | 190817.4 |
| 197.91 | 89.8 |
| 206.70 | 89.8 |
| 207.42 | 199172.4 |
| 208.78 | 718.7 |
| 214.55 | 628.9 |
| 217.53 | 555023.6 |
| 221.70 | 1976.5 |
| 272.97 | 151378.2 |
| 285.93 | 62887.1 |
| 135 | 1-methyl-1H-indole-3,5,6-triol | | C9H9NO3 |  | 191.88 | 101285.3 |
| 191.98 | 4521.7 |
| 197.55 | 100.5 |
| 200.14 | 181469.6 |
| 208.22 | 803.9 |
| 210.21 | 2512.0 |
| 215.19 | 116056.1 |
| 220.20 | 7938.0 |
| 222.34 | 4320.7 |
| 228.60 | 1808.7 |
| 228.76 | 582491.2 |
| 241.46 | 100.5 |
| 282.13 | 120577.8 |
| 308.88 | 68930.3 |
| 136 | 1,2,3,4-tetrahydro-4aH-carbazol-4a-ol | | C12H13NO |  | 196.17 | 29042.8 |
| 200.96 | 69482.2 |
| 207.16 | 3584.4 |
| 218.70 | 232342.5 |
| 222.69 | 283994.6 |
| 257.92 | 4411.6 |
| 274.27 | 87036.5 |
| 283.54 | 33086.7 |
| 137 | 5,7-dihydroxy-2-(4-hydroxyphenyl)-4H-chromen-4-one | | C15H10O5 |  | 191.16 | 121.6 |
| 191.44 | 37194.6 |
| 193.61 | 201531.4 |
| 197.36 | 68311.6 |
| 199.42 | 310562.6 |
| 205.44 | 123495.7 |
| 207.08 | 212714.1 |
| 210.19 | 394797.4 |
| 219.46 | 54941.0 |
| 225.09 | 170657.5 |
| 229.88 | 32454.1 |
| 230.27 | 11790.4 |
| 235.99 | 86665.8 |
| 239.14 | 58952.2 |
| 249.36 | 144037.8 |
| 260.01 | 143065.4 |
| 270.92 | 10210.3 |
| 284.29 | 99064.0 |
| 301.48 | 373526.0 |
| 326.77 | 568129.0 |
| 138 | 3H-indol-2-amine | | C8H8N2 |  | 193.17 | 668.9 |
| 195.88 | 157279.5 |
| 198.78 | 418.1 |
| 205.25 | 116308.2 |
| 212.21 | 268069.1 |
| 213.25 | 1672.3 |
| 217.04 | 83.6 |
| 255.51 | 250342.8 |
| 279.60 | 45486.5 |
| 139 | 3,5,7-trihydroxy-2-(4-hydroxyphenyl)-4H-chromen-4-one | | C15H10O6 |  | 190.98 | 138609.5 |
| 191.33 | 69113.1 |
| 192.78 | 13924.8 |
| 194.40 | 250135.8 |
| 194.62 | 181022.7 |
| 194.85 | 15585.6 |
| 195.05 | 3704.8 |
| 197.65 | 106416.3 |
| 202.06 | 11625.3 |
| 204.15 | 101434.0 |
| 207.64 | 307368.1 |
| 210.20 | 117530.6 |
| 211.09 | 12391.8 |
| 211.73 | 107182.8 |
| 217.46 | 93002.5 |
| 219.96 | 255.5 |
| 224.86 | 98112.5 |
| 227.10 | 7792.8 |
| 232.15 | 58254.3 |
| 233.23 | 2044.0 |
| 238.17 | 182811.2 |
| 244.65 | 21206.6 |
| 247.15 | 140398.0 |
| 248.31 | 4215.8 |
| 263.36 | 285011.7 |
| 278.86 | 30276.9 |
| 280.94 | 22356.4 |
| 293.16 | 193286.8 |
| 318.33 | 2427.3 |
| 338.69 | 506148.2 |
| 140 | 2-(3,4-dihydroxyphenyl)-3,5,7-trihydroxy-4H-chromen-4-one | | C15H10O7 |  | 190.00 | 34673.2 |
| 191.09 | 212618.7 |
| 192.77 | 11514.1 |
| 194.76 | 1439.3 |
| 195.03 | 16355.3 |
| 195.19 | 26037.6 |
| 196.67 | 118412.3 |
| 198.09 | 271497.8 |
| 201.53 | 12560.9 |
| 202.08 | 174674.5 |
| 206.71 | 352881.7 |
| 207.74 | 2616.8 |
| 210.01 | 220731.0 |
| 212.28 | 3663.6 |
| 213.65 | 23813.3 |
| 214.88 | 142879.8 |
| 215.94 | 20673.1 |
| 217.06 | 70524.0 |
| 221.47 | 21719.8 |
| 227.12 | 77458.6 |
| 233.05 | 14654.3 |
| 233.62 | 392.5 |
| 244.19 | 135029.3 |
| 246.09 | 66467.9 |
| 247.35 | 142225.6 |
| 257.23 | 333778.7 |
| 269.04 | 82169.0 |
| 276.71 | 21850.7 |
| 281.14 | 32710.6 |
| 303.56 | 81383.9 |
| 318.96 | 2486.0 |
| 343.02 | 567463.1 |
| 141 | 5,7-dihydroxy-3-(4-hydroxyphenyl)-4H-chromen-4-one | | C15H10O5 |  | 190.47 | 1276.5 |
| 191.17 | 285712.8 |
| 191.59 | 16246.9 |
| 193.91 | 256816.6 |
| 194.05 | 3481.5 |
| 195.42 | 4990.1 |
| 198.82 | 28432.0 |
| 203.19 | 323660.9 |
| 203.53 | 46535.7 |
| 209.68 | 46535.7 |
| 211.03 | 75431.9 |
| 212.42 | 9400.0 |
| 215.19 | 4642.0 |
| 216.06 | 42474.0 |
| 220.35 | 11256.8 |
| 220.56 | 40269.0 |
| 224.07 | 2553.1 |
| 229.71 | 127189.8 |
| 236.16 | 68236.9 |
| 239.90 | 252987.0 |
| 245.99 | 4525.9 |
| 247.65 | 8471.6 |
| 259.86 | 25414.7 |
| 262.96 | 729832.6 |
| 278.70 | 99918.3 |
| 284.44 | 98525.7 |
| 316.01 | 116.0 |
| 318.52 | 42822.1 |
| 142 | 7-hydroxy-3-(4-methoxyphenyl)-4H-chromen-4-one | | C16H12O4 |  | 190.89 | 191908.7 |
| 193.97 | 32461.6 |
| 194.66 | 113802.0 |
| 195.79 | 24999.1 |
| 201.27 | 130095.0 |
| 206.97 | 12934.9 |
| 210.77 | 24874.8 |
| 212.79 | 94897.2 |
| 213.96 | 92658.5 |
| 215.87 | 3482.5 |
| 216.53 | 83579.2 |
| 220.57 | 3606.8 |
| 221.36 | 38182.8 |
| 226.79 | 554458.3 |
| 233.60 | 11442.4 |
| 238.59 | 15173.6 |
| 244.53 | 41416.5 |
| 256.22 | 12437.4 |
| 261.02 | 22138.5 |
| 267.13 | 167158.4 |
| 272.14 | 913152.3 |
| 280.92 | 18158.6 |
| 312.67 | 124.4 |
| 332.96 | 28979.1 |
| 143 | 6-hydroxy-4-methoxybenzofuran-3(2H)-one | | C9H8O4 |  | 199.08 | 538984.7 |
| 213.82 | 80706.2 |
| 216.27 | 78266.5 |
| 264.93 | 350344.9 |
| 298.18 | 72899.1 |
| 303.70 | 292.8 |
| 144 | 1,3,6-trihydroxy-9H-xanthen-9-one | | C13H8O5 |  | 192.53 | 12187.6 |
| 198.93 | 108549.1 |
| 201.55 | 15490.7 |
| 205.36 | 113.9 |
| 205.87 | 326216.8 |
| 208.01 | 50117.1 |
| 213.39 | 13440.5 |
| 216.33 | 113.9 |
| 216.75 | 17541.0 |
| 224.18 | 122559.1 |
| 232.42 | 278263.8 |
| 236.61 | 71758.6 |
| 243.95 | 653686.5 |
| 256.58 | 39979.8 |
| 267.68 | 39410.3 |
| 290.60 | 330545.1 |
| 316.71 | 152971.1 |
| 145 | 1,8-dihydroxy-9H-xanthen-9-one | | C13H8O4 |  | 193.98 | 48376.3 |
| 196.25 | 132.5 |
| 198.61 | 243206.6 |
| 200.95 | 64280.8 |
| 209.59 | 37243.1 |
| 212.80 | 61099.9 |
| 217.32 | 34989.9 |
| 224.69 | 132.5 |
| 229.66 | 291317.8 |
| 241.15 | 156924.6 |
| 252.69 | 853542.7 |
| 255.56 | 37110.6 |
| 276.54 | 88270.1 |
| 319.35 | 182769.5 |
| 359.95 | 68522.0 |
| 146 | 1,4,8-trihydroxy-3-methyl-9H-xanthen-9-one | | C14H10O5 |  | 194.71 | 53993.9 |
| 195.54 | 160.7 |
| 197.26 | 160.7 |
| 201.17 | 40334.7 |
| 203.19 | 136109.7 |
| 208.29 | 159571.3 |
| 209.36 | 174837.5 |
| 217.06 | 95453.5 |
| 223.50 | 79544.6 |
| 224.96 | 160.7 |
| 239.98 | 633625.1 |
| 248.56 | 54154.6 |
| 259.81 | 41298.9 |
| 261.69 | 679584.2 |
| 297.44 | 324927.7 |
| 325.35 | 185604.1 |
| 403.35 | 80187.4 |
| 147 | 1,6-dihydroxy-3-methoxy-8-methyl-9H-xanthen-9-one | | C15H12O5 |  | 197.29 | 18568.8 |
| 199.99 | 38222.8 |
| 204.97 | 16519.0 |
| 207.16 | 55465.3 |
| 209.00 | 120.6 |
| 210.95 | 339543.9 |
| 216.45 | 33399.7 |
| 220.58 | 1085.2 |
| 220.74 | 241.2 |
| 223.79 | 136613.4 |
| 235.34 | 108760.1 |
| 239.26 | 146018.3 |
| 246.77 | 824864.9 |
| 260.01 | 51365.7 |
| 264.69 | 23150.7 |
| 292.80 | 438296.2 |
| 312.60 | 91638.3 |
| 148 | 6-methoxy-9H-purine | | C6H6N4O |  | 207.52 | 44066.0 |
| 212.79 | 31991.0 |
| 228.07 | 262200.6 |
| 282.10 | 82564.9 |
| 149 | 7-hydroxy-2-phenyl-4H-chromen-4-one | | C15H10O3 |  | 192.75 | 254361.8 |
| 194.01 | 71923.8 |
| 199.31 | 475987.5 |
| 202.60 | 138829.7 |
| 208.43 | 182557.5 |
| 214.35 | 182915.9 |
| 218.97 | 179092.7 |
| 220.98 | 1792.1 |
| 224.52 | 153286.1 |
| 230.08 | 91039.8 |
| 231.19 | 74791.2 |
| 239.74 | 31063.4 |
| 247.52 | 89486.6 |
| 273.83 | 35006.1 |
| 277.87 | 282079.9 |
| 298.85 | 108961.0 |
| 315.28 | 583036.9 |
| 150 | 2-(4-hydroxyphenyl)-4H-chromen-4-one | | C15H10O3 |  | 190.24 | 20736.3 |
| 196.62 | 92069.2 |
| 197.76 | 88869.9 |
| 201.40 | 89462.3 |
| 202.79 | 509639.1 |
| 211.43 | 108302.8 |
| 217.40 | 53203.4 |
| 217.42 | 355.5 |
| 223.70 | 61853.4 |
| 228.62 | 74413.7 |
| 233.94 | 10190.4 |
| 240.51 | 112924.0 |
| 247.77 | 298484.3 |
| 259.30 | 53203.4 |
| 263.46 | 16115.1 |
| 272.40 | 9834.9 |
| 294.22 | 109487.7 |
| 324.89 | 834784.3 |
| 151 | 3,5,7-trihydroxy-2-(4-hydroxyphenyl)chroman-4-one | | C15H12O6 |  | 190.02 | 412045.1 |
| 192.24 | 49555.0 |
| 192.98 | 101016.0 |
| 197.20 | 7862.1 |
| 204.14 | 577863.8 |
| 211.60 | 20489.1 |
| 213.09 | 68972.0 |
| 214.37 | 120433.0 |
| 218.54 | 49912.4 |
| 221.19 | 341286.3 |
| 223.74 | 14533.0 |
| 226.75 | 17391.9 |
| 235.43 | 41454.7 |
| 235.99 | 3692.8 |
| 245.10 | 36570.6 |
| 251.36 | 5598.8 |
| 277.56 | 318772.1 |
| 286.81 | 43956.2 |
| 307.11 | 29661.5 |
| 324.12 | 62420.2 |
| 152 | 9H-purine-2,6-diol | | C5H4N4O2 |  | 194.78 | 64676.1 |
| 205.89 | 3670.6 |
| 238.09 | 148512.7 |
| 272.87 | 111513.0 |
| 153 | 2-(3,4-dihydroxyphenyl)-7,8-dihydroxychroman-4-one | | C15H12O6 |  | 190.17 | 14708.4 |
| 192.64 | 376511.4 |
| 193.51 | 146240.3 |
| 195.17 | 68237.4 |
| 196.08 | 165168.3 |
| 199.13 | 116220.6 |
| 199.96 | 116461.7 |
| 201.78 | 35444.9 |
| 206.98 | 34962.6 |
| 207.78 | 11091.6 |
| 209.99 | 843.9 |
| 211.23 | 323223.5 |
| 212.28 | 108263.6 |
| 219.18 | 231838.4 |
| 222.61 | 176018.8 |
| 224.48 | 1326.2 |
| 227.86 | 64620.6 |
| 229.01 | 99583.2 |
| 240.10 | 10850.5 |
| 251.97 | 90661.7 |
| 265.36 | 4701.9 |
| 279.82 | 289104.8 |
| 304.30 | 11453.3 |
| 323.13 | 101271.1 |
| 327.01 | 1929.0 |
| 154 | 2-amino-9H-purin-6-ol | | C5H5N5O |  | 208.91 | 4266.7 |
| 224.53 | 151366.1 |
| 261.30 | 117097.1 |
| 155 | 2-(3,4-dihydroxyphenyl)-8-hydroxy-7-methoxychroman-4-one | | C16H14O6 |  | 190.04 | 65186.5 |
| 191.21 | 21563.6 |
| 192.39 | 127274.8 |
| 192.61 | 201508.1 |
| 194.65 | 388516.6 |
| 198.30 | 205349.9 |
| 200.90 | 12516.8 |
| 202.57 | 129009.8 |
| 206.36 | 36187.2 |
| 208.55 | 7683.6 |
| 209.48 | 152804.1 |
| 210.02 | 743.6 |
| 210.94 | 320231.8 |
| 220.50 | 308086.8 |
| 222.04 | 107941.9 |
| 226.17 | 64566.9 |
| 227.34 | 743.6 |
| 230.20 | 139791.6 |
| 243.62 | 11401.4 |
| 252.00 | 94433.7 |
| 265.43 | 3965.7 |
| 284.57 | 344274.0 |
| 304.76 | 12516.8 |
| 325.60 | 65806.2 |
| 330.05 | 61468.7 |
| 156 | Pteridines | | C6H4N4 |  | 194.11 | 133600.9 |
| 194.82 | 220.1 |
| 202.56 | 135875.2 |
| 228.79 | 4475.4 |
| 278.18 | 213423.9 |
| 157 | 2-(3,4-dihydroxyphenyl)-7-hydroxy-8-methoxychroman-4-one | | C16H14O6 |  | 191.26 | 611.0 |
| 191.93 | 8799.1 |
| 192.62 | 10143.4 |
| 193.25 | 341942.8 |
| 195.97 | 398525.9 |
| 199.63 | 162538.9 |
| 203.21 | 65260.0 |
| 204.58 | 30308.0 |
| 206.95 | 2810.8 |
| 210.11 | 122.2 |
| 211.11 | 433600.0 |
| 212.13 | 15276.2 |
| 213.71 | 89824.1 |
| 218.16 | 41429.1 |
| 223.00 | 199079.6 |
| 224.51 | 142252.1 |
| 230.82 | 88113.2 |
| 232.72 | 1955.4 |
| 233.95 | 1833.1 |
| 252.54 | 91901.7 |
| 265.25 | 3421.9 |
| 275.42 | 355385.8 |
| 303.59 | 31407.9 |
| 305.42 | 52794.6 |
| 325.50 | 17353.8 |
| 158 | Pteridin-2-ol | | C6H4N4O |  | 190.75 | 363667.5 |
| 203.42 | 117342.6 |
| 215.00 | 203173.1 |
| 239.15 | 36243.7 |
| 322.27 | 232130.2 |
| 159 | 7,8-dihydroxy-2-(4-hydroxyphenyl)chroman-4-one | | C15H12O5 |  | 190.06 | 297393.1 |
| 195.52 | 3458.1 |
| 196.34 | 44835.5 |
| 199.61 | 112685.1 |
| 201.89 | 5008.2 |
| 206.28 | 4650.5 |
| 209.93 | 243614.4 |
| 211.98 | 5366.0 |
| 215.38 | 166344.6 |
| 217.24 | 299062.6 |
| 221.04 | 150246.7 |
| 223.12 | 129259.9 |
| 229.06 | 108392.3 |
| 233.50 | 8466.3 |
| 242.94 | 23252.5 |
| 244.37 | 15024.7 |
| 249.83 | 16813.3 |
| 279.28 | 267224.6 |
| 289.50 | 41616.0 |
| 319.37 | 41854.4 |
| 325.65 | 40423.5 |
| 160 | 1-methylpteridin-2(1H)-one | | C7H6N4O |  | 196.31 | 97.9 |
| 200.33 | 3230.5 |
| 201.99 | 26235.5 |
| 203.12 | 5677.8 |
| 223.35 | 783.1 |
| 230.14 | 22026.1 |
| 246.53 | 40919.5 |
| 255.88 | 8614.6 |
| 287.37 | 309931.1 |
| 321.54 | 2251.6 |
| 161 | Quinoline | | C9H7N |  | 190.92 | 2543.8 |
| 195.25 | 193754.0 |
| 198.20 | 2967.8 |
| 200.36 | 249378.8 |
| 212.52 | 58762.1 |
| 216.43 | 877107.7 |
| 274.73 | 31712.9 |
| 284.41 | 1271.9 |
| 284.76 | 47569.4 |
| 162 | Quinolin-2-ol | | C9H7NO |  | 201.22 | 289522.6 |
| 205.11 | 194566.4 |
| 216.90 | 228127.7 |
| 219.48 | 638471.3 |
| 252.19 | 805.5 |
| 270.21 | 66943.7 |
| 292.14 | 61931.9 |
| 163 | Pteridin-4-ol | | C6H4N4O |  | 197.79 | 42071.9 |
| 219.39 | 272457.7 |
| 243.92 | 25748.0 |
| 299.28 | 182508.0 |
| 164 | 2-methoxyquinoline | | C10H9NO |  | 191.34 | 234212.2 |
| 202.79 | 211104.0 |
| 207.94 | 121525.2 |
| 215.46 | 92.1 |
| 220.61 | 211380.2 |
| 222.06 | 779602.7 |
| 255.25 | 552.4 |
| 268.80 | 63892.8 |
| 292.06 | 68311.9 |
| 165 | 3-ethyl-6-methoxy-2-methylquinolin-4-ol | | C13H15NO2 |  | 190.00 | 3953.4 |
| 196.01 | 3614.5 |
| 196.39 | 1920.2 |
| 200.41 | 18072.7 |
| 202.06 | 50377.6 |
| 212.10 | 1355.5 |
| 212.14 | 142096.4 |
| 218.23 | 174514.2 |
| 225.39 | 225.9 |
| 226.04 | 668236.9 |
| 239.23 | 997950.2 |
| 278.40 | 903.6 |
| 288.33 | 37161.9 |
| 321.85 | 97027.6 |
| 166 | 4-methoxyfuro[2,3-b]quinoline | C12H9NO2 | |  | 195.53 | 332.6 |
| 203.11 | 107324.1 |
| 208.57 | 69184.1 |
| 209.80 | 181719.2 |
| 214.17 | 41577.0 |
| 222.28 | 159434.0 |
| 240.61 | 1109496.4 |
| 245.54 | 139809.6 |
| 245.65 | 443.5 |
| 289.14 | 11641.6 |
| 323.24 | 153446.9 |
| 167 | Isoquinoline | | C9H7N |  | 190.41 | 349.4 |
| 192.94 | 873.6 |
| 197.31 | 89016.3 |
| 203.64 | 110156.6 |
| 210.93 | 932356.3 |
| 218.39 | 215945.4 |
| 237.49 | 873.6 |
| 267.22 | 14151.8 |
| 277.95 | 1135.6 |
| 290.10 | 65430.0 |
| 168 | 2-benzylidene-6-hydroxybEnzofuran-3(2H)-one | | C15H10O3 |  | 194.84 | 7413.8 |
| 196.02 | 145338.7 |
| 196.70 | 419.6 |
| 197.26 | 75676.9 |
| 202.36 | 196256.3 |
| 205.03 | 279.8 |
| 208.33 | 85049.0 |
| 214.43 | 57492.0 |
| 218.25 | 6154.9 |
| 222.56 | 139.9 |
| 223.40 | 60569.5 |
| 231.54 | 5035.8 |
| 239.51 | 699.4 |
| 243.39 | 99736.8 |
| 257.14 | 325508.4 |
| 291.35 | 65885.0 |
| 303.11 | 31473.7 |
| 341.09 | 611010.2 |
| 367.12 | 735646.2 |
| 169 | Isoquinolin-6-ol | | C9H7NO |  | 192.47 | 452.0 |
| 194.62 | 28384.4 |
| 199.90 | 38327.9 |
| 214.37 | 450082.0 |
| 218.36 | 172656.5 |
| 225.22 | 706354.8 |
| 233.71 | 1627.1 |
| 272.88 | 994.4 |
| 279.28 | 8135.6 |
| 293.92 | 53062.5 |
| 170 | Acridine | | C13H9N |  | 193.32 | 34928.4 |
| 193.56 | 7241.3 |
| 194.42 | 10506.9 |
| 197.48 | 17464.2 |
| 211.92 | 35354.4 |
| 214.88 | 150504.6 |
| 223.04 | 2555.7 |
| 226.91 | 2271.8 |
| 239.66 | 8519.1 |
| 245.79 | 2894089.5 |
| 284.47 | 426.0 |
| 317.89 | 116002.1 |
| 322.21 | 709.9 |
| 381.19 | 87747.0 |
| 171 | Acridin-4-ol | | C13H9NO |  | 190.20 | 646.1 |
| 191.52 | 398970.9 |
| 196.90 | 132128.8 |
| 201.13 | 51688.5 |
| 203.60 | 1615.3 |
| 205.32 | 161.5 |
| 213.53 | 191570.7 |
| 218.33 | 144889.4 |
| 223.93 | 62995.4 |
| 231.79 | 433376.1 |
| 246.42 | 5168.9 |
| 257.60 | 2598479.9 |
| 303.80 | 9853.1 |
| 318.99 | 969.2 |
| 320.21 | 17121.8 |
| 411.27 | 93200.9 |
| 172 | Acridin-1-ol | | C13H9NO |  | 190.78 | 826.0 |
| 192.40 | 527789.9 |
| 201.61 | 60625.6 |
| 203.32 | 1486.7 |
| 205.68 | 35681.6 |
| 209.77 | 330.4 |
| 212.09 | 51540.0 |
| 214.24 | 192779.6 |
| 223.70 | 4129.8 |
| 230.03 | 559672.1 |
| 246.39 | 34690.4 |
| 258.38 | 2597321.1 |
| 306.95 | 10737.5 |
| 319.27 | 991.2 |
| 321.42 | 26100.4 |
| 417.63 | 96472.4 |
| 173 | (E)-2-methoxy-4-(prop-1-en-1-yl)phenol | | C10H12O2 |  | 190.33 | 1006.0 |
| 190.48 | 49109.4 |
| 193.16 | 1006.0 |
| 201.14 | 2835.0 |
| 203.71 | 99407.7 |
| 206.45 | 422139.9 |
| 214.35 | 182.9 |
| 234.08 | 134616.6 |
| 258.39 | 260911.0 |
| 289.49 | 313678.5 |
| 174 | 5,6-dihydronaphthalen-1-ol | | C10H10O |  | 192.57 | 43202.6 |
| 200.11 | 5488.9 |
| 205.59 | 174138.3 |
| 209.89 | 127748.6 |
| 229.11 | 188568.6 |
| 269.22 | 83749.3 |
| 286.58 | 172987.4 |
| 175 | (E)-4-(3,5-dihydroxystyryl)benzene-1,3-diol | | C14H12O4 |  | 190.45 | 49756.8 |
| 192.50 | 35646.7 |
| 194.54 | 8911.7 |
| 196.06 | 18194.7 |
| 196.32 | 70303.2 |
| 198.53 | 12996.2 |
| 202.29 | 495.1 |
| 203.26 | 25126.0 |
| 204.91 | 24630.9 |
| 207.54 | 319706.3 |
| 213.84 | 40350.1 |
| 214.08 | 8787.9 |
| 216.22 | 254230.3 |
| 227.81 | 7302.6 |
| 229.51 | 6931.3 |
| 240.74 | 73521.3 |
| 252.55 | 124268.3 |
| 265.48 | 62010.4 |
| 284.38 | 71417.2 |
| 306.87 | 42701.8 |
| 338.47 | 1131782.6 |
| 176 | Cinnamic acid | | C9H8O2 |  | 197.70 | 45845.8 |
| 197.79 | 89.5 |
| 199.99 | 165564.1 |
| 208.01 | 77006.5 |
| 222.54 | 120434.6 |
| 282.88 | 38413.7 |
| 291.81 | 632796.7 |
| 177 | (2E,4E)-5-phenylpenta-2,4-dienoic acid | | C11H10O2 |  | 190.21 | 104994.3 |
| 193.49 | 162711.8 |
| 194.39 | 469.2 |
| 201.90 | 70856.5 |
| 205.24 | 47863.3 |
| 223.39 | 52321.2 |
| 242.00 | 178666.3 |
| 249.74 | 15837.1 |
| 295.18 | 18535.3 |
| 339.75 | 1462998.9 |
| 178 | 5-hydroxy-2-phenoxybenzoic acid | | C13H10O4 |  | 191.72 | 344.1 |
| 192.09 | 5964.1 |
| 193.27 | 114465.3 |
| 195.74 | 37275.8 |
| 197.81 | 195325.0 |
| 201.49 | 77648.3 |
| 206.40 | 104142.7 |
| 218.93 | 367137.6 |
| 225.37 | 41748.9 |
| 233.16 | 51956.7 |
| 244.49 | 65146.6 |
| 245.54 | 52071.4 |
| 250.28 | 344.1 |
| 252.58 | 23168.3 |
| 259.79 | 7799.2 |
| 313.28 | 152888.0 |
| 179 | 2-hydroxy-4-(4-hydroxy-2-methoxy-6-pentylbenzoyl)-6-pentylbenzoic acid | | C25H32O6 |  | 190.17 | 209087.3 |
| 190.81 | 30615.7 |
| 192.10 | 600788.4 |
| 192.72 | 29535.2 |
| 193.53 | 28274.5 |
| 195.33 | 178111.4 |
| 196.11 | 153258.7 |
| 197.86 | 30075.4 |
| 198.14 | 18189.3 |
| 198.86 | 390440.4 |
| 199.46 | 161542.9 |
| 199.95 | 60691.2 |
| 201.02 | 127145.3 |
| 203.51 | 314801.6 |
| 204.40 | 121382.3 |
| 206.33 | 132187.9 |
| 206.79 | 10085.2 |
| 207.22 | 17108.8 |
| 208.45 | 75999.0 |
| 208.60 | 191258.2 |
| 212.33 | 216110.9 |
| 213.65 | 75278.6 |
| 213.90 | 50065.7 |
| 215.65 | 51866.6 |
| 217.19 | 720.4 |
| 219.86 | 73297.6 |
| 222.69 | 19089.8 |
| 225.13 | 214670.2 |
| 230.54 | 4322.2 |
| 235.29 | 15307.9 |
| 243.13 | 9004.6 |
| 246.28 | 30075.4 |
| 259.97 | 76719.4 |
| 267.58 | 402146.4 |
| 277.65 | 288328.0 |
| 322.18 | 123003.1 |
| 332.91 | 38900.0 |
| 341.17 | 5582.9 |
| 398.89 | 84463.4 |
| 180 | 1,5-dihydroxyanthracene-9,10-dione | | C14H8O4 |  | 193.85 | 983520.3 |
| 202.71 | 186.0 |
| 207.87 | 117732.3 |
| 214.69 | 147304.8 |
| 220.01 | 558.0 |
| 230.73 | 1439570.1 |
| 245.63 | 309117.0 |
| 273.17 | 42963.9 |
| 285.79 | 356172.7 |
| 350.37 | 186.0 |
| 430.19 | 505151.5 |
| 181 | 2,6-dihydroxyanthracene-9,10-dione | | C14H8O4 |  | 192.65 | 855149.6 |
| 198.74 | 866.9 |
| 199.11 | 173.4 |
| 210.44 | 192460.7 |
| 213.23 | 346.8 |
| 213.89 | 56351.1 |
| 218.62 | 825153.5 |
| 241.43 | 281755.5 |
| 279.73 | 1121473.6 |
| 300.22 | 208759.2 |
| 349.74 | 341921.1 |
| 182 | Naphthalen-2-ol | | C10H8O |  | 196.78 | 34987.7 |
| 199.81 | 402.2 |
| 205.56 | 146385.3 |
| 215.11 | 154227.4 |
| 220.05 | 1053351.1 |
| 228.06 | 327054.6 |
| 275.19 | 12165.3 |
| 303.01 | 61127.9 |
| 183 | Phenanthren-9-ol | | C14H10O |  | 193.85 | 39591.7 |
| 196.62 | 67994.4 |
| 201.37 | 65166.4 |
| 206.78 | 240992.7 |
| 207.49 | 491.8 |
| 215.68 | 322758.1 |
| 216.91 | 240869.8 |
| 223.00 | 144595.6 |
| 239.65 | 63690.9 |
| 247.59 | 372555.1 |
| 262.17 | 751380.9 |
| 272.25 | 97257.8 |
| 310.57 | 191072.8 |
| 332.70 | 27173.2 |
| 184 | 1,1-Methylenebis-naphthalen-2-ol | | C21H16O2 |  | 195.56 | 18199.3 |
| 199.31 | 1371.2 |
| 200.85 | 31412.6 |
| 205.24 | 15207.7 |
| 206.10 | 42257.4 |
| 208.72 | 82271.0 |
| 210.10 | 69681.0 |
| 210.58 | 25927.8 |
| 212.39 | 54348.7 |
| 213.54 | 6980.6 |
| 216.06 | 77658.8 |
| 217.80 | 158558.6 |
| 219.79 | 154569.7 |
| 222.50 | 985631.4 |
| 223.77 | 122284.6 |
| 224.71 | 468446.0 |
| 226.22 | 67811.2 |
| 229.29 | 364236.1 |
| 231.75 | 1119134.8 |
| 243.52 | 498.6 |
| 252.10 | 11592.7 |
| 261.35 | 747.9 |
| 269.09 | 1246.5 |
| 278.89 | 28670.2 |
| 279.57 | 32035.8 |
| 293.79 | 15457.0 |
| 305.58 | 72922.0 |
| 309.91 | 152076.7 |
| 323.70 | 23933.4 |
| 185 | 14-Dihydroxyanthraquinone | | C14H8O4 |  | 190.49 | 1822.6 |
| 193.85 | 18630.6 |
| 194.14 | 202.5 |
| 195.42 | 26123.4 |
| 201.27 | 312063.3 |
| 206.97 | 770539.3 |
| 220.64 | 405.0 |
| 223.84 | 114416.5 |
| 224.43 | 243008.4 |
| 238.61 | 8910.3 |
| 240.41 | 202.5 |
| 243.78 | 9922.8 |
| 244.18 | 1228205.2 |
| 268.33 | 22680.8 |
| 285.21 | 389218.5 |
| 321.23 | 5265.2 |
| 332.46 | 113809.0 |
| 354.94 | 2835.1 |
| 469.68 | 425872.3 |
| 186 | 2-Hydroxy-1,4 naphthoquinone | | C10H6O3 |  | 191.50 | 859915.1 |
| 195.38 | 220885.4 |
| 197.68 | 411960.1 |
| 203.24 | 317.1 |
| 210.94 | 158.6 |
| 218.45 | 56133.1 |
| 219.56 | 3012.8 |
| 226.32 | 158.6 |
| 236.87 | 452236.4 |
| 288.01 | 394041.9 |
| 340.56 | 117181.9 |
| 385.88 | 6184.2 |
| 187 | 5,7-dihydroxy-2-(3-hydroxy-4-methoxyphenyl)chroman-4-one | | C16H14O6 |  | 192.09 | 359948.9 |
| 195.14 | 337920.9 |
| 195.58 | 12621.4 |
| 196.87 | 68227.2 |
| 200.63 | 10954.4 |
| 202.90 | 158958.6 |
| 205.79 | 220041.5 |
| 206.19 | 597255.6 |
| 214.82 | 42746.2 |
| 216.70 | 26433.6 |
| 218.00 | 6667.9 |
| 219.62 | 12383.3 |
| 221.08 | 136216.2 |
| 222.40 | 23337.7 |
| 224.29 | 15836.3 |
| 236.11 | 14407.5 |
| 249.38 | 96923.1 |
| 262.41 | 11192.6 |
| 273.44 | 368045.7 |
| 290.81 | 2024.2 |
| 307.82 | 48342.5 |
| 320.92 | 74061.6 |
| 188 | 7-Hydroxy-4-chromone | | C9H6O3 |  | 201.90 | 3463.7 |
| 208.56 | 344193.5 |
| 220.17 | 125881.0 |
| 222.73 | 242063.6 |
| 231.11 | 94905.6 |
| 272.48 | 50867.0 |
| 277.97 | 180409.6 |
| 189 | 8-hydroxyquinoline | | C9H7NO |  | 196.60 | 442577.5 |
| 204.63 | 37784.9 |
| 216.85 | 7406.7 |
| 233.25 | 881720.0 |
| 264.74 | 2146.9 |
| 284.35 | 3649.7 |
| 329.64 | 52383.7 |
| 190 | alpha-Mangostin | | C24H26O6 |  | 190.42 | 21817.5 |
| 191.34 | 78732.8 |
| 192.05 | 101770.0 |
| 192.34 | 138765.0 |
| 193.11 | 27915.6 |
| 193.71 | 397187.6 |
| 194.96 | 332683.5 |
| 196.39 | 39434.2 |
| 197.07 | 2981.3 |
| 198.94 | 11789.6 |
| 199.65 | 5149.5 |
| 201.33 | 11654.1 |
| 202.07 | 13957.8 |
| 203.62 | 81714.1 |
| 204.44 | 64097.5 |
| 204.87 | 17345.6 |
| 206.66 | 163021.7 |
| 207.84 | 27373.6 |
| 210.87 | 172236.6 |
| 212.01 | 146218.1 |
| 214.79 | 38892.1 |
| 215.93 | 10976.5 |
| 217.57 | 677.6 |
| 218.37 | 6911.1 |
| 219.58 | 24663.3 |
| 222.20 | 91742.1 |
| 224.05 | 11247.5 |
| 226.34 | 5285.0 |
| 227.45 | 31032.4 |
| 233.61 | 6233.6 |
| 235.17 | 48378.0 |
| 239.64 | 268179.5 |
| 244.22 | 13957.8 |
| 251.43 | 1022714.0 |
| 261.07 | 66401.2 |
| 268.75 | 20191.4 |
| 276.08 | 20868.9 |
| 294.11 | 328889.2 |
| 307.00 | 160175.9 |
| 327.12 | 93774.8 |
| 334.13 | 32387.5 |
| 191 | Caffeic acid | | C9H8O4 |  | 191.42 | 940.1 |
| 192.60 | 1292.7 |
| 197.87 | 19155.0 |
| 198.51 | 117.5 |
| 201.34 | 238438.8 |
| 204.84 | 3055.4 |
| 214.48 | 210352.6 |
| 216.84 | 352.5 |
| 220.94 | 281214.5 |
| 235.55 | 235.0 |
| 247.63 | 79087.9 |
| 300.03 | 302719.8 |
| 336.98 | 639401.5 |
| 192 | Chlorogenic acid | | C16H18O9 |  | 194.79 | 13977.4 |
| 196.72 | 128385.1 |
| 205.40 | 18248.3 |
| 210.98 | 121008.2 |
| 212.30 | 87358.8 |
| 212.46 | 388.3 |
| 215.52 | 3753.2 |
| 220.19 | 92665.1 |
| 227.27 | 129.4 |
| 233.24 | 1423.6 |
| 234.07 | 129.4 |
| 235.37 | 3623.8 |
| 245.56 | 539036.3 |
| 263.43 | 647.1 |
| 291.49 | 401591.8 |
| 337.41 | 632995.6 |
| 193 | Coniferyl alcohol | | C10H12O3 |  | 190.63 | 2216.3 |
| 196.23 | 69592.0 |
| 201.72 | 4344.0 |
| 206.29 | 58687.7 |
| 207.01 | 152570.4 |
| 210.02 | 8953.9 |
| 215.66 | 8067.3 |
| 227.31 | 405140.4 |
| 269.53 | 78368.5 |
| 278.74 | 442019.7 |
| 194 | Ellagic acid | | C14H6O8 |  | 196.37 | 128.9 |
| 197.12 | 412190.2 |
| 199.09 | 199006.2 |
| 207.60 | 128.9 |
| 212.52 | 128.9 |
| 223.71 | 60449.4 |
| 243.74 | 813167.0 |
| 247.95 | 128.9 |
| 250.82 | 990261.8 |
| 271.13 | 327509.5 |
| 308.23 | 386.7 |
| 308.30 | 72178.4 |
| 345.70 | 289873.6 |
| 195 | Esculetin | | C9H6O4 |  | 190.89 | 704.2 |
| 191.38 | 586.9 |
| 195.14 | 469.5 |
| 199.02 | 750845.5 |
| 203.77 | 1760.6 |
| 206.74 | 117.4 |
| 207.86 | 352123.9 |
| 215.34 | 1643.2 |
| 220.49 | 250594.8 |
| 227.93 | 117492.0 |
| 236.10 | 234.7 |
| 252.57 | 79697.4 |
| 290.90 | 206109.9 |
| 339.49 | 290267.5 |
| 196 | Ferulic acid | | C10H10O4 |  | 194.44 | 113931.1 |
| 203.61 | 97231.1 |
| 209.28 | 2721.5 |
| 217.44 | 126920.0 |
| 222.19 | 130631.1 |
| 253.08 | 602313.1 |
| 296.34 | 468342.1 |
| 350.18 | 352679.1 |
| 197 | Hispidol | | C15H10O4 |  | 196.05 | 55629.9 |
| 196.58 | 150.4 |
| 198.23 | 28867.4 |
| 200.11 | 300.7 |
| 201.06 | 96826.2 |
| 203.95 | 296793.3 |
| 207.41 | 32024.8 |
| 212.59 | 19094.6 |
| 221.77 | 150.4 |
| 223.69 | 4209.8 |
| 229.95 | 89609.3 |
| 238.70 | 2405.6 |
| 247.12 | 109606.0 |
| 256.61 | 272436.4 |
| 266.82 | 178015.8 |
| 291.00 | 7667.9 |
| 294.74 | 100885.7 |
| 340.85 | 279653.3 |
| 383.55 | 1213484.7 |
| 198 | Naphthalen-2-ol | | C10H8O |  | 196.78 | 34987.8 |
| 199.81 | 402.2 |
| 205.56 | 146385.5 |
| 215.11 | 154227.6 |
| 220.05 | 1053352.5 |
| 228.06 | 327055.0 |
| 275.19 | 12165.3 |
| 303.01 | 61128.0 |
| 199 | p-Coumaryl alcohol | | C9H10O2 |  | 191.30 | 41464.3 |
| 198.06 | 251103.5 |
| 199.80 | 343.4 |
| 201.36 | 7554.6 |
| 215.59 | 1802.8 |
| 217.51 | 217107.9 |
| 263.26 | 289906.5 |
| 280.84 | 317721.0 |
| 200 | Quercetin | | C15H10O7 |  | 190.24 | 10697.5 |
| 192.34 | 218090.8 |
| 196.78 | 119915.4 |
| 197.44 | 103696.6 |
| 198.73 | 626665.9 |
| 201.57 | 257602.5 |
| 203.67 | 206530.6 |
| 204.41 | 44170.3 |
| 207.73 | 10179.9 |
| 208.57 | 323167.7 |
| 210.99 | 26053.6 |
| 211.60 | 33645.3 |
| 215.15 | 328689.0 |
| 220.97 | 119225.3 |
| 224.44 | 44342.8 |
| 230.25 | 31229.8 |
| 244.70 | 145969.0 |
| 246.55 | 62977.2 |
| 252.17 | 284691.3 |
| 256.49 | 451365.1 |
| 269.82 | 198076.1 |
| 286.44 | 29504.4 |
| 288.62 | 18634.3 |
| 295.15 | 148384.5 |
| 325.45 | 42444.9 |
| 370.83 | 979510.5 |
| 201 | Rosmarinic acid | | C18H16O8 |  | 190.20 | 9620.5 |
| 190.29 | 3446.2 |
| 191.13 | 718.0 |
| 191.92 | 111569.4 |
| 194.47 | 220267.1 |
| 195.82 | 109989.9 |
| 197.58 | 327959.6 |
| 197.83 | 82851.4 |
| 201.81 | 3446.2 |
| 206.37 | 3015.4 |
| 206.94 | 574.4 |
| 208.72 | 2441.0 |
| 210.46 | 173887.5 |
| 211.68 | 28143.6 |
| 212.04 | 861.5 |
| 213.73 | 193559.3 |
| 214.11 | 287.2 |
| 214.97 | 41210.3 |
| 218.65 | 22400.0 |
| 219.15 | 102666.9 |
| 233.29 | 17518.0 |
| 233.58 | 14071.8 |
| 240.13 | 861.5 |
| 241.50 | 1435.9 |
| 245.98 | 462216.2 |
| 248.37 | 68923.2 |
| 253.78 | 77682.2 |
| 292.48 | 148615.7 |
| 293.36 | 256164.6 |
| 340.03 | 652760.2 |
| 357.16 | 718.0 |
| 202 | Sinapic acid | | C11H12O5 |  | 192.97 | 1008.2 |
| 194.12 | 23567.0 |
| 197.32 | 505745.1 |
| 200.53 | 252.1 |
| 204.21 | 140771.8 |
| 217.47 | 2394.5 |
| 217.91 | 167993.6 |
| 239.80 | 593081.6 |
| 242.74 | 152114.2 |
| 330.23 | 388162.2 |
| 349.78 | 378458.1 |
| 203 | Sinapyl alcohol | | C11H14O4 |  | 190.21 | 38122.9 |
| 192.77 | 862.1 |
| 194.54 | 39368.1 |
| 196.48 | 4980.9 |
| 204.24 | 124617.8 |
| 207.28 | 292435.1 |
| 211.69 | 16666.8 |
| 219.09 | 1341.0 |
| 219.82 | 159675.5 |
| 233.88 | 217530.3 |
| 270.29 | 116092.8 |
| 289.37 | 445309.7 |
| 204 | Tryptophan | | C11H12N2O2 |  | 191.25 | 101152.6 |
| 193.51 | 33337.9 |
| 197.01 | 91006.3 |
| 199.21 | 88728.5 |
| 202.35 | 2381.3 |
| 203.86 | 174868.7 |
| 207.61 | 17186.6 |
| 212.12 | 666654.5 |
| 219.41 | 207.1 |
| 231.25 | 10974.6 |
| 255.60 | 47004.4 |
| 265.70 | 10042.8 |
| 270.86 | 81377.6 |
| 307.58 | 6522.6 |

**Supplementary Table 2 |** The details about solid extracted DOM samples.

| No. | Sample | Type | Source | Location | Note |
| --- | --- | --- | --- | --- | --- |
| 1 | AM HPO | Inland | The amazon river | 1.87° S, 61.58° W | From Institut de Physique du Globe de Paris, Paris, France |
| 2 | AM TPH | Inland | The amazon river | 1.87° S, 61.58° W | From Institut de Physique du Globe de Paris, Paris, France |
| 3 | Mississippi | Inland | Mississippi River | N/A | From International Humic Acid Association (IHSS) |
| 4 | SRFA | Inland | The suwannee river | N/A | From IHSS |
| 5 | SRHA | Inland | The suwannee river | N/A | From IHSS |
| 6 | SRHPiA | Inland | The suwannee river | N/A | From IHSS |
| 7 | SRNOM | Inland | The suwannee river | N/A | From IHSS |
| 8 | Nordic FA | Inland | A drinking water reservoir at Vallsjøen, Skarnes, Norway | N/A | From IHSS |
| 9 | Nordic NOM | Inland | A drinking water reservoir at Vallsjøen, Skarnes, Norway | N/A | From IHSS |
| 10 | XJH | Inland | Xiaojiahe River, Peking, China | 39.62° N, 116.30° E | Extracted in PKU lab |
| 11 | DJK | Inland | Danjiangkou Reservoir, Hubei, China | 32.68° N, 111.59° E | Extracted in PKU lab |
| 12 | NSBD1 | Inland | Canal, Henan, China | 33.70° N, 111.97° E | Extracted in PKU lab |
| 13 | NSBD2 | Inland | Canal, Henan, China | 35.46° N, 113.82° E | Extracted in PKU lab |
| 14 | NSBD3 | Inland | Canal, Hebei, China | 37.58° N, 114.50° E | Extracted in PKU lab |
| 15 | WML | Inland | Weiming Lake, Peking, China | 39.59° N, 116.18° E | Extracted in PKU lab |
| 16 | TCH | Inland | Tuanchenghu Lake, Peking, China | 39.98° N, 116.25° E | Extracted in PKU lab |
| 17 | Sea1 | Sea | Pearl River Delta, Guangdong, China | 22.42° N, 113.74° E | From China University of Petroleum |
| 18 | Sea2 | Sea | Pearl River Delta, Guangdong, China | 22.59° N, 113.67° E | From China University of Petroleum |
| 19 | Sea3 | Sea | Pearl River Delta, Guangdong, China | 22.48° N, 113.68° E | From China University of Petroleum |
| 20 | Sea4 | Sea | Pearl River Delta, Guangdong, China | 22.56° N, 113.72° E | From China University of Petroleum |
| 21 | SeaQD | Sea | Bohai Estuary, Shandong, China | 38.62° N, 119.66° E | From Shandong University, Shandong, China |
| 22 | SeaQHD | Sea | Bohai Estuary, Hebei, China | 39.56° N, 119.93° E | Extracted in PKU lab |
| 23 | SeaMariana | Sea | Mariana Trench | 11.45° N, 142.15° E | From China University of Petroleum, Peking, China |

**Supplementary Table 3 | The values of m and n in 13 distinct regions.** The *m* and *n* are fitted by global regional relationships between *S*275-380 and ln(*a*g(380)) using least squares minimization fitting (LSMF in 11 distinct regions (SupplementaryFigs. 5 and 6). It should be noticed that the DOM data in ATZ and ESC are significantly affected by estuary input, and these runoff mixed DOM lead to weak correlations between ln(*a*g(380)) and *S*275-380. Therefore, we set *m* and *n* by minimizing the deviation of *a*g(275) (see equation (8) in main content) using 57 and 84 records of DOM absorption spectra for ATZ and ESC respectively. To eliminate spatial discontinuities in the regional boundaries, inverse distance weight method (IDWM) was used to smooth *m* and *n* by 2°×2° pixel box.

| regions | m | n |
| --- | --- | --- |
| Antarctic Zone (AAZ) | -7.20×10-3 | 1.10×10-3 |
| North Pacific (NP) | -6.80×10-3 | 3.80×10-3 |
| Sub-Tropical Pacific (STP) | -7.33×10-3 | 3.30×10-3 |
| Tropical Pacific (TP) | -7.88×10-3 | -1.48×10-3 |
| North Atlantic (NA) | -2.05×10-3 | 1.81×10-2 |
| Sub-Tropical Atlantic (STA) | -7.61×10-3 | 2.12×10-3 |
| Tropical Atlantic (TA) | -4.22×10-3 | 1.35×10-3 |
| Sub-Tropical Indian (STI) | -5.40×10-3 | 9.90×10-3 |
| South Sub-Tropical Zone (STZ) | -5.01×10-3 | 9.75×10-3 |
| Northwestern Sargasso Sea (NSS) | -4.00×10-3 | 1.75×10-2 |
| Mexico Bay (MB) | -2.50×10-3 | 2.00×10-2 |
| Arctic Zone (ATZ) | -5.40×10-3 | 1.60×10-2 |
| East Sea of China (ESC) | -3.91×10-3 | 1.49×10-2 |

**SI References**

1 Dittmar, T., Koch, B., Hertkorn, N. & Kattner, G. A simple and efficient method for the solid-phase extraction of dissolved organic matter (SPE-DOM) from seawater. *Limnol. Oceanogr-Meth* **6**, 230-235, doi:<https://doi.org/10.4319/lom.2008.6.230> (2008).

2 Longhurst, A. R. *Ecological Geography of the Sea, 2nd Edition*. (Academic Press, 2007).

3 Roshan, S. & DeVries, T. Efficient dissolved organic carbon production and export in the oligotrophic ocean. *Nat. Commun.* **8**, 2036, doi:10.1038/s41467-017-02227-3 (2017).
